# Supplementary material
Source: PubMed Central journal article supplement (PMC2756219)
Supplement: NIHMS136594-supplement-1_si_001.pdf [file NIHMS136594-supplement-1_si_001.pdf]

Supplementary Table 1A. LC/ESI-FTICR-MS Glycopeptide Compositions for C.97ZA012 gp140 ΔCFI

| Env Domain | Charge State | Experimental Mass | Theoretical Mass | Mass Error | Peptide Sequence                  | *Mod | Glycan Composition       |
|------------|--------------|-------------------|------------------|------------|-----------------------------------|------|--------------------------|
| C1         | 3+           | 1686.5120         | 1686.4249        | 52         | EVHNVWATHACVPTDNPQE IVLENTENFNMWK |      | [Hex]3[HexNAc]2[Fuc]1    |
|            | 3+           | 1862.1899         | 1862.1532        | 20         | EVHNVWATHACVPTDNPQE IVLENTENFNMWK |      | [Hex]5[HexNAc]3[Fuc]1    |
|            | 3+           | 1853.7943         | 1853.8094        | 8          | EVHNVWATHACVPTDNPQE IVLENTENFNMWK |      | [Hex]7[HexNAc]2          |
|            | 3+           | 1961.8061         | 1961.8446        | 20         | EVHNVWATHACVPTDNPQE IVLENTENFNMWK |      | [Hex]9[HexNAc]2          |
|            | 4+           | 1228.5843         | 1228.5560        | 23         | EVHNVWATHACVPTDNPQE IVLENTENFNMWK |      | [Hex]3[HexNAc]2          |
|            | 4+           | 1279.3458         | 1279.3259        | 16         | EVHNVWATHACVPTDNPQE IVLENTENFNMWK |      | [Hex]3[HexNAc]3          |
|            | 4+           | 1315.8685         | 1315.8403        | 21         | EVHNVWATHACVPTDNPQE IVLENTENFNMWK |      | [Hex]3[HexNAc]3[Fuc]1    |
|            | 4+           | 1366.6483         | 1366.6102        | 28         | EVHNVWATHACVPTDNPQE IVLENTENFNMWK |      | [Hex]3[HexNAc]4[Fuc]1    |
|            | 4+           | 1380.8803         | 1380.8656        | 11         | EVHNVWATHACVPTDNPQE IVLENTENFNMWK |      | [Hex]3[HexNAc]5          |
|            | 4+           | 1417.4301         | 1417.3800        | 35         | EVHNVWATHACVPTDNPQE IVLENTENFNMWK |      | [Hex]3[HexNAc]5[Fuc]1    |
|            | 4+           | 1468.2086         | 1468.1499        | 40         | EVHNVWATHACVPTDNPQE IVLENTENFNMWK |      | [Hex]3[HexNAc]6[Fuc]1    |
|            | 4+           | 1269.0853         | 1269.0692        | 13         | EVHNVWATHACVPTDNPQE IVLENTENFNMWK |      | [Hex]4[HexNAc]2          |
|            | 4+           | 1319.8610         | 1319.8391        | 17         | EVHNVWATHACVPTDNPQE IVLENTENFNMWK |      | [Hex]4[HexNAc]3          |
|            | 4+           | 1356.3880         | 1356.3535        | 25         | EVHNVWATHACVPTDNPQE IVLENTENFNMWK |      | [Hex]4[HexNAc]3[Fuc]1    |
|            | 4+           | 1370.6337         | 1370.6089        | 18         | EVHNVWATHACVPTDNPQE IVLENTENFNMWK |      | [Hex]4[HexNAc]4          |
|            | 4+           | 1421.4149         | 1421.3788        | 25         | EVHNVWATHACVPTDNPQE IVLENTENFNMWK |      | [Hex]4[HexNAc]5          |
|            | 4+           | 1457.9081         | 1457.8932        | 10         | EVHNVWATHACVPTDNPQE IVLENTENFNMWK |      | [Hex]4[HexNAc]5[Fuc]1    |
|            | 4+           | 1508.7104         | 1508.6631        | 31         | EVHNVWATHACVPTDNPQE IVLENTENFNMWK |      | [Hex]4[HexNAc]6[Fuc]1    |
|            | 4+           | 1309.6095         | 1309.5824        | 21         | EVHNVWATHACVPTDNPQE IVLENTENFNMWK |      | [Hex]5[HexNAc]2          |
|            | 4+           | 1360.3998         | 1360.3523        | 35         | EVHNVWATHACVPTDNPQE IVLENTENFNMWK |      | [Hex]5[HexNAc]3          |
|            | 4+           | 1447.6798         | 1447.6366        | 30         | EVHNVWATHACVPTDNPQE IVLENTENFNMWK |      | [Hex]5[HexNAc]4[Fuc]1    |
|            | 4+           | 1498.4729         | 1498.4064        | 44         | EVHNVWATHACVPTDNPQE IVLENTENFNMWK |      | [Hex]5[HexNAc]5[Fuc]1    |
|            | 4+           | 1350.1311         | 1350.0956        | 26         | EVHNVWATHACVPTDNPQE IVLENTENFNMWK |      | [Hex]6[HexNAc]2          |
|            | 4+           | 1400.9080         | 1400.8655        | 30         | EVHNVWATHACVPTDNPQE IVLENTENFNMWK |      | [Hex]6[HexNAc]3          |
|            | 4+           | 1437.4307         | 1437.3692        | 43         | EVHNVWATHACVPTDNPQE IVLENTENFNMWK |      | [Hex]6[HexNAc]3[Fuc]1    |
|            | 4+           | 1451.6797         | 1451.6353        | 31         | EVHNVWATHACVPTDNPQE IVLENTENFNMWK |      | [Hex]6[HexNAc]4          |
|            | 4+           | 1538.9764         | 1538.9196        | 37         | EVHNVWATHACVPTDNPQE IVLENTENFNMWK |      | [Hex]6[HexNAc]5[Fuc]1    |
|            | 4+           | 1589.7191         | 1589.6895        | 19         | EVHNVWATHACVPTDNPQE IVLENTENFNMWK |      | [Hex]6[HexNAc]6[Fuc]1    |
|            | 4+           | 1390.6262         | 1390.6088        | 13         | EVHNVWATHACVPTDNPQE IVLENTENFNMWK |      | [Hex]7[HexNAc]2          |
|            | 4+           | 1630.2246         | 1630.2027        | 13         | EVHNVWATHACVPTDNPQE IVLENTENFNMWK |      | [Hex]7[HexNAc]6[Fuc]1    |
|            | 4+           | 1681.0378         | 1680.9725        | 39         | EVHNVWATHACVPTDNPQE IVLENTENFNMWK |      | [Hex]7[HexNAc]7[Fuc]1    |
|            | 4+           | 1431.1611         | 1431.1220        | 27         | EVHNVWATHACVPTDNPQE IVLENTENFNMWK |      | [Hex]8[HexNAc]2          |
|            | 4+           | 1471.6718         | 1471.6352        | 25         | EVHNVWATHACVPTDNPQE IVLENTENFNMWK |      | [Hex]9[HexNAc]2          |
| V1         | 2+           | 1384.6777         | 1384.6350        | 31         | LTPLCVTLHCTNATFK                  |      | [Hex]3[HexNAc]2          |
|            | 2+           | 1457.7006         | 1457.6640        | 25         | LTPLCVTLHCTNATFK                  |      | [Hex]3[HexNAc]2[Fuc]1    |
|            | 2+           | 1559.2514         | 1559.2037        | 31         | LTPLCVTLHCTNATFK                  |      | [Hex]3[HexNAc]3[Fuc]1    |
|            | 2+           | 1660.8085         | 1660.7433        | 39         | LTPLCVTLHCTNATFK                  |      | [Hex]3[HexNAc]4[Fuc]1    |
|            | 2+           | 1465.7070         | 1465.6615        | 31         | LTPLCVTLHCTNATFK                  |      | [Hex]4[HexNAc]2          |
|            | 2+           | 1538.7398         | 1538.6904        | 32         | LTPLCVTLHCTNATFK                  |      | [Hex]4[HexNAc]2[Fuc]1    |
|            | 2+           | 1567.2351         | 1567.2011        | 22         | LTPLCVTLHCTNATFK                  |      | [Hex]4[HexNAc]3          |
|            | 2+           | 1640.2806         | 1640.2301        | 31         | LTPLCVTLHCTNATFK                  |      | [Hex]4[HexNAc]3[Fuc]1    |
|            | 2+           | 1546.7388         | 1546.6878        | 33         | LTPLCVTLHCTNATFK                  |      | [Hex]5[HexNAc]2          |
|            | 2+           | 1648.2718         | 1648.2275        | 27         | LTPLCVTLHCTNATFK                  |      | [Hex]5[HexNAc]3          |
|            | 2+           | 1721.3096         | 1721.2565        | 31         | LTPLCVTLHCTNATFK                  |      | [Hex]5[HexNAc]3[Fuc]1    |
|            | 2+           | 1895.3128         | 1895.3149        | 1          | LTPLCVTLHCTNATFK                  |      | [Hex]5[HexNAc]4[NeuNAc]1 |
|            | 2+           | 1932.3649         | 1932.3333        | 16         | LTPLCVTLHCTNATFK                  |      | [Hex]6[HexNAc]5          |
|            | 2+           | 1789.8316         | 1789.7671        | 36         | LTPLCVTLHCTNATFK                  |      | [Hex]8[HexNAc]2          |
|            | 3+           | 1175.2204         | 1175.1911        | 25         | LTPLCVTLHCTNATFK                  |      | [Hex]3[HexNAc]5[Fuc]1    |
|            | 3+           | 1242.9176         | 1242.8842        | 27         | LTPLCVTLHCTNATFK                  |      | [Hex]3[HexNAc]6[Fuc]1    |

| Env Domain | Charge State | Experimental Mass | Theoretical Mass | Mass Error | Peptide Sequence             | *Mod | Glycan Composition             |
|------------|--------------|-------------------|------------------|------------|------------------------------|------|--------------------------------|
|            | 3+           | 1229.2470         | 1229.2087        | 31         | LTPLCVTLHCTNATFK             |      | [Hex]4[HexNAc]5[Fuc]1          |
|            | 3+           | 1215.5632         | 1215.5332        | 25         | LTPLCVTLHCTNATFK             |      | [Hex]5[HexNAc]4[Fuc]1          |
|            | 3+           | 1283.2672         | 1283.2263        | 32         | LTPLCVTLHCTNATFK             |      | [Hex]5[HexNAc]5[Fuc]1          |
|            | 3+           | 1085.5037         | 1085.4786        | 23         | LTPLCVTLHCTNATFK             |      | [Hex]6[HexNAc]2                |
|            | 3+           | 1153.1944         | 1153.1717        | 20         | LTPLCVTLHCTNATFK             |      | [Hex]6[HexNAc]3                |
|            | 3+           | 1337.2996         | 1337.2439        | 42         | LTPLCVTLHCTNATFK             |      | [Hex]6[HexNAc]5[Fuc]1          |
|            | 3+           | 1434.3174         | 1434.2757        | 29         | LTPLCVTLHCTNATFK             |      | [Hex]6[HexNAc]5[Fuc]1[NeuNAc]1 |
|            | 3+           | 1404.9861         | 1404.9370        | 35         | LTPLCVTLHCTNATFK             |      | [Hex]6[HexNAc]6[Fuc]1          |
|            | 3+           | 1139.5243         | 1139.4962        | 25         | LTPLCVTLHCTNATFK             |      | [Hex]7[HexNAc]2                |
|            | 3+           | 1247.5654         | 1247.5314        | 27         | LTPLCVTLHCTNATFK             |      | [Hex]9[HexNAc]2                |
|            | 2+           | 1272.0752         | 1272.0499        | 20         | NNVTNDMNKEIR                 |      | [Hex]3[HexNAc]3                |
|            | 2+           | 1345.0995         | 1345.0788        | 15         | NNVTNDMNKEIR                 |      | [Hex]3[HexNAc]3[Fuc]1          |
|            | 2+           | 1373.618          | 1373.5895        | 21         | NNVTNDMNKEIR                 |      | [Hex]3[HexNAc]4                |
|            | 2+           | 1446.6509         | 1446.6185        | 22         | NNVTNDMNKEIR                 |      | [Hex]3[HexNAc]4[Fuc]1          |
|            | 2+           | 1475.1438         | 1475.1293        | 10         | NNVTNDMNKEIR                 |      | [Hex]3[HexNAc]5                |
|            | 2+           | 1548.1662         | 1548.1582        | 5          | NNVTNDMNKEIR                 |      | [Hex]3[HexNAc]5[Fuc]1          |
|            | 2+           | 1649.746          | 1649.6979        | 29         | NNVTNDMNKEIR                 |      | [Hex]3[HexNAc]6[Fuc]1          |
|            | 2+           | 1779.8017         | 1779.7483        | 30         | NNVTNDMNKEIR                 |      | [Hex]3[HexNAc]8                |
|            | 2+           | 1251.5479         | 1251.5366        | 9          | NNVTNDMNKEIR                 |      | [Hex]4[HexNAc]2                |
|            | 2+           | 1426.1328         | 1426.1052        | 19         | NNVTNDMNKEIR                 |      | [Hex]4[HexNAc]3[Fuc]1          |
|            | 2+           | 1454.6366         | 1454.6160        | 14         | NNVTNDMNKEIR                 |      | [Hex]4[HexNAc]4                |
|            | 2+           | 1332.5883         | 1332.5630        | 19         | NNVTNDMNKEIR                 |      | [Hex]5[HexNAc]2                |
|            | 2+           | 1413.5913         | 1413.5894        | 1          | NNVTNDMNKEIR                 |      | [Hex]6[HexNAc]2                |
|            | 2+           | 1494.6314         | 1494.6158        | 10         | NNVTNDMNKEIR                 |      | [Hex]7[HexNAc]2                |
|            | 2+           | 1575.6732         | 1575.6422        | 20         | NNVTNDMNKEIR                 |      | [Hex]8[HexNAc]2                |
|            | 3+           | 1797.1473         | 1797.1064        | 23         | LTPLCVTLHCTNATFKNNVTNDMNKEIR |      | [Hex]6[HexNAc]6[Fuc]2          |
|            | 3+           | 1864.8564         | 1864.7995        | 31         | LTPLCVTLHCTNATFKNNVTNDMNKEIR |      | [Hex]6[HexNAc]7[Fuc]2          |
|            | 3+           | 1932.4516         | 1932.4926        | 21         | LTPLCVTLHCTNATFKNNVTNDMNKEIR |      | [Hex]6[HexNAc]8[Fuc]2          |
|            | 4+           | 1348.0982         | 1348.0861        | 9          | LTPLCVTLHCTNATFKNNVTNDMNKEIR |      | [Hex]6[HexNAc]6[Fuc]2          |
|            | 4+           | 1449.6774         | 1449.6213        | 39         | LTPLCVTLHCTNATFKNNVTNDMNKEIR |      | [Hex]6[HexNAc]8[Fuc]2          |
|            | 4+           | 1500.4533         | 1500.3911        | 42         | LTPLCVTLHCTNATFKNNVTNDMNKEIR |      | [Hex]6[HexNAc]9[Fuc]2          |
|            | 4+           | 1551.1456         | 1551.1610        | 10         | LTPLCVTLHCTNATFKNNVTNDMNKEIR |      | [Hex]6[HexNAc]10[Fuc]2         |
|            | 4+           | 1392.6260         | 1392.5935        | 23         | LTPLCVTLHCTNATFKNNVTNDMNKEIR |      | [Hex]8[HexNAc]6[Fuc]1          |
|            | 4+           | 1443.4314         | 1443.3634        | 47         | LTPLCVTLHCTNATFKNNVTNDMNKEIR |      | [Hex]8[HexNAc]7[Fuc]1          |
| VI/V2      | 2+           | 1117.9978         | 1117.9650        | 29         | NCSFNTTTEIR                  |      | [Hex]3[HexNAc]2                |
|            | 2+           | 1191.0145         | 1190.9940        | 17         | NCSFNTTTEIR                  |      | [Hex]3[HexNAc]2[Fuc]1          |
|            | 2+           | 1292.5666         | 1292.5337        | 25         | NCSFNTTTEIR                  |      | [Hex]3[HexNAc]3[Fuc]1          |
|            | 2+           | 1394.1208         | 1394.0733        | 34         | NCSFNTTTEIR                  |      | [Hex]3[HexNAc]4[Fuc]1          |
|            | 2+           | 1495.6714         | 1495.6131        | 39         | NCSFNTTTEIR                  |      | [Hex]3[HexNAc]5[Fuc]1          |
|            | 2+           | 1597.2174         | 1597.1528        | 40         | NCSFNTTTEIR                  |      | [Hex]3[HexNAc]6[Fuc]1          |
|            | 2+           | 1199.0479         | 1198.9915        | 47         | NCSFNTTTEIR                  |      | [Hex]4[HexNAc]2                |
|            | 2+           | 1373.6023         | 1373.5601        | 31         | NCSFNTTTEIR                  |      | [Hex]4[HexNAc]3[Fuc]1          |
|            | 2+           | 1576.7074         | 1576.6394        | 43         | NCSFNTTTEIR                  |      | [Hex]4[HexNAc]5[Fuc]1          |
|            | 2+           | 1280.0545         | 1280.0178        | 29         | NCSFNTTTEIR                  |      | [Hex]5[HexNAc]2                |
|            | 2+           | 1381.6064         | 1381.5575        | 35         | NCSFNTTTEIR                  |      | [Hex]5[HexNAc]3                |
|            | 2+           | 1454.6422         | 1454.5865        | 38         | NCSFNTTTEIR                  |      | [Hex]5[HexNAc]3[Fuc]1          |
|            | 2+           | 1361.0869         | 1361.0443        | 31         | NCSFNTTTEIR                  |      | [Hex]6 [HexNAc]2               |

| Env Domain | Charge State | Experimental Mass | Theoretical Mass | Mass Error | Peptide Sequence                    | *Mod | Glycan Composition             |
|------------|--------------|-------------------|------------------|------------|-------------------------------------|------|--------------------------------|
|            | 2+           | 1462.6308         | 1462.5839        | 32         | NCSFNTTTEIR                         |      | [Hex]6[HexNAc]3                |
|            | 2+           | 1608.2094         | 1608.1316        | 48         | NCSFNTTTEIR                         |      | [Hex]6[HexNAc]3[NeuNAc]1       |
|            | 2+           | 1738.7870         | 1738.6923        | 54         | NCSFNTTTEIR                         |      | [Hex]6[HexNAc]5[Fuc]1          |
|            | 2+           | 1442.1192         | 1442.0707        | 34         | NCSFNTTTEIR                         |      | [Hex]7[HexNAc]2                |
|            | 2+           | 1523.144          | 1523.0971        | 31         | NCSFNTTTEIR                         |      | [Hex]8[HexNAc]2                |
|            | 3+           | 1706.3176         | 1706.3405        | 13         | NCSFNTTTEIR                         |      | [Hex]7[HexNAc]13               |
|            | 3+           | 1760.3012         | 1760.3581        | 32         | NCSFNTTTEIR                         |      | [Hex]8[HexNAc]13               |
|            | 3+           | 1611.3716         | 1611.2964        | 47         | NCSFNTTTEIR                         |      | [Hex]9[HexNAc]10               |
|            | 3+           | 1679.0649         | 1678.9895        | 45         | NCSFNTTTEIR                         |      | [Hex]9[HexNAc]11               |
|            | 3+           | 1746.7584         | 1746.6826        | 43         | NCSFNTTTEIR                         |      | [Hex]9[HexNAc]12               |
|            | 3+           | 1814.3407         | 1814.3757        | 19         | NCSFNTTTEIR                         |      | [Hex]9[HexNAc]13               |
| C2         | 2+           | 876.3345          | 876.3297         | 6          | CNNK                                |      | [Hex]5[HexNAc]2                |
|            | 2+           | 957.3649          | 957.3561         | 9          | CNNK                                |      | [Hex]6[HexNAc]2                |
|            | 2+           | 1038.3876         | 1038.3825        | 9          | CNNK                                |      | [Hex]7[HexNAc]2                |
|            | 2+           | 1119.4129         | 1119.4089        | 4          | CNNK                                |      | [Hex]8[HexNAc]2                |
|            | 2+           | 1200.4354         | 1200.4353        | 0.1        | CNNK                                |      | [Hex]9[HexNAc]2                |
|            | 5+           | 1296.6599         | 1296.6055        | 42         | GPCNNVSTVQCTHGIKPVVSTQLLNGSLAEKEIIR |      | [Hex]10[HexNAc]4               |
|            | 5+           | 1329.0505         | 1329.0160        | 26         | GPCNNVSTVQCTHGIKPVVSTQLLNGSLAEKEIIR |      | [Hex]11[HexNAc]4               |
|            | 5+           | 1361.4399         | 1361.4266        | 10         | GPCNNVSTVQCTHGIKPVVSTQLLNGSLAEKEIIR |      | [Hex]12[HexNAc]4               |
|            | 5+           | 1393.8780         | 1393.8371        | 29         | GPCNNVSTVQCTHGIKPVVSTQLLNGSLAEKEIIR |      | [Hex]13[HexNAc]4               |
|            | 5+           | 1426.2056         | 1426.2477        | 30         | GPCNNVSTVQCTHGIKPVVSTQLLNGSLAEKEIIR |      | [Hex]14[HexNAc]4               |
|            | 5+           | 1458.6355         | 1458.6583        | 16         | GPCNNVSTVQCTHGIKPVVSTQLLNGSLAEKEIIR |      | [Hex]15[HexNAc]4               |
|            | 5+           | 1491.0972         | 1491.0688        | 19         | GPCNNVSTVQCTHGIKPVVSTQLLNGSLAEKEIIR |      | [Hex]16[HexNAc]4               |
|            | 5+           | 1523.4186         | 1523.4793        | 40         | GPCNNVSTVQCTHGIKPVVSTQLLNGSLAEKEIIR |      | [Hex]17[HexNAc]4               |
|            | 5+           | 1555.9773         | 1555.8900        | 56         | GPCNNVSTVQCTHGIKPVVSTQLLNGSLAEKEIIR |      | [Hex]18[HexNAc]4               |
|            | 2+           | 956.4303          | 956.4125         | 19         | SENLDNVK                            |      | [Hex]3[HexNAc]2                |
|            | 2+           | 1029.4577         | 1029.4414        | 16         | SENLDNVK                            |      | [Hex]3[HexNAc]2[Fuc]1          |
|            | 2+           | 1057.9724         | 1057.9522        | 19         | SENLDNVK                            |      | [Hex]3[HexNAc]3                |
|            | 2+           | 1131.0034         | 1130.9811        | 20         | SENLDNVK                            |      | [Hex]3[HexNAc]3[Fuc]1          |
|            | 2+           | 1159.5209         | 1159.4918        | 25         | SENLDNVK                            |      | [Hex]3[HexNAc]4                |
|            | 2+           | 1232.5498         | 1232.5208        | 24         | SENLDNVK                            |      | [Hex]3[HexNAc]4[Fuc]1          |
|            | 2+           | 1261.0560         | 1261.0316        | 19         | SENLDNVK                            |      | [Hex]3[HexNAc]5                |
|            | 2+           | 1334.0944         | 1334.0605        | 25         | SENLDNVK                            |      | [Hex]3[HexNAc]5[Fuc]1          |
|            | 2+           | 1435.6382         | 1435.6002        | 26         | SENLDNVK                            |      | [Hex]3[HexNAc]6[Fuc]1          |
|            | 2+           | 1037.4598         | 1037.4389        | 20         | SENLDNVK                            |      | [Hex]4[HexNAc]2                |
|            | 2+           | 1110.4972         | 1110.4678        | 26         | SENLDNVK                            |      | [Hex]4[HexNAc]2[Fuc]1          |
|            | 2+           | 1139.0038         | 1138.9786        | 22         | SENLDNVK                            |      | [Hex]4[HexNAc]3                |
|            | 2+           | 1212.0326         | 1212.0075        | 21         | SENLDNVK                            |      | [Hex]4[HexNAc]3[Fuc]1          |
|            | 2+           | 1357.5870         | 1357.5552        | 23         | SENLDNVK                            |      | [Hex]4[HexNAc]3[Fuc]1[NeuNAc]1 |
|            | 2+           | 1240.5444         | 1240.5183        | 21         | SENLDNVK                            |      | [Hex]4[HexNAc]4                |
|            | 2+           | 1342.0880         | 1342.0580        | 22         | SENLDNVK                            |      | [Hex]4[HexNAc]5                |
|            | 2+           | 1415.1224         | 1415.0868        | 25         | SENLDNVK                            |      | [Hex]4[HexNAc]5[Fuc]1          |
|            | 2+           | 1560.6747         | 1560.6346        | 26         | SENLDNVK                            |      | [Hex]4[HexNAc]5[Fuc]1[NeuNAc]1 |
|            | 2+           | 1118.4875         | 1118.4653        | 20         | SENLDNVK                            |      | [Hex]5[HexNAc]2                |
|            | 2+           | 1220.0333         | 1220.0050        | 23         | SENLDNVK                            |      | [Hex]5[HexNAc]3                |
|            | 2+           | 1293.0656         | 1293.0339        | 25         | SENLDNVK                            |      | [Hex]5[HexNAc]3[Fuc]1          |
|            | 2+           | 1365.5911         | 1365.5527        | 28         | SENLDNVK                            |      | [Hex]5[HexNAc]3[NeuNAc]1       |
|            | 2+           | 1321.5876         | 1321.5447        | 32         | SENLDNVK                            |      | [Hex]5[HexNAc]4                |
|            | 2+           | 1394.6147         | 1394.5736        | 29         | SENLDNVK                            |      | [Hex]5[HexNAc]4[Fuc]1          |
|            | 2+           | 1540.1956         | 1540.1213        | 48         | SENLDNVK                            |      | [Hex]5[HexNAc]4[Fuc]1[NeuNAc]1 |

| Env Domain | Charge State | Experimental Mass | Theoretical Mass | Mass Error | Peptide Sequence | *Mod | Glycan Composition             |
|------------|--------------|-------------------|------------------|------------|------------------|------|--------------------------------|
|            | 2+           | 1496.1582         | 1496.1133        | 30         | SENLTDNVK        |      | [Hex]5[HexNac]5[Fuc]1          |
|            | 2+           | 1199.5260         | 1199.4917        | 29         | SENLTDNVK        |      | [Hex]6[HexNac]2                |
|            | 2+           | 1301.0584         | 1301.0313        | 21         | SENLTDNVK        |      | [Hex]6[HexNac]3                |
|            | 2+           | 1374.0952         | 1374.0603        | 25         | SENLTDNVK        |      | [Hex]6[HexNac]3[Fuc]1          |
|            | 2+           | 1446.6307         | 1446.5791        | 36         | SENLTDNVK        |      | [Hex]6[HexNac]3[NeuNac]1       |
|            | 2+           | 1548.1885         | 1548.1187        | 45         | SENLTDNVK        |      | [Hex]6[HexNac]4[NeuNac]1       |
|            | 2+           | 1577.1939         | 1577.1397        | 34         | SENLTDNVK        |      | [Hex]6[HexNac]5[Fuc]1          |
|            | 2+           | 1722.7309         | 1722.6874        | 25         | SENLTDNVK        |      | [Hex]6[HexNac]5[Fuc]1[NeuNac]1 |
|            | 2+           | 1678.7197         | 1678.6794        | 24         | SENLTDNVK        |      | [Hex]6[HexNac]6[Fuc]1          |
|            | 2+           | 1780.2788         | 1780.2190        | 34         | SENLTDNVK        |      | [Hex]6[HexNac]7[Fuc]1          |
|            | 2+           | 1280.5508         | 1280.5181        | 26         | SENLTDNVK        |      | [Hex]7[HexNac]2                |
|            | 2+           | 1382.0808         | 1382.0577        | 17         | SENLTDNVK        |      | [Hex]7[HexNac]3                |
|            | 2+           | 1759.7514         | 1759.7058        | 26         | SENLTDNVK        |      | [Hex]7[HexNac]6[Fuc]1          |
|            | 2+           | 1905.3157         | 1905.2535        | 33         | SENLTDNVK        |      | [Hex]7[HexNac]6[Fuc]1[NeuNac]1 |
|            | 2+           | 1361.5776         | 1361.5445        | 24         | SENLTDNVK        |      | [Hex]8[HexNac]2                |
|            | 2+           | 1442.6102         | 1442.5709        | 27         | SENLTDNVK        |      | [Hex]9[HexNac]2                |
|            | 2+           | 915.4720          | 915.4538         | 20         | TIIVHLNK         |      | [Hex]3[HexNac]2                |
|            | 2+           | 988.4410          | 988.4827         | 42         | TIIVHLNK         |      | [Hex]3[HexNac]2[Fuc]1          |
|            | 2+           | 1017.0183         | 1016.9934        | 24         | TIIVHLNK         |      | [Hex]3[HexNac]3                |
|            | 2+           | 1090.0482         | 1090.0224        | 24         | TIIVHLNK         |      | [Hex]3[HexNac]3[Fuc]1          |
|            | 2+           | 1191.5970         | 1191.5621        | 29         | TIIVHLNK         |      | [Hex]3[HexNac]4[Fuc]1          |
|            | 2+           | 1191.5062         | 1191.5620        | 47         | TIIVHLNK         |      | [Hex]3[HexNac]4[Fuc]1          |
|            | 2+           | 1293.1412         | 1293.1018        | 30         | TIIVHLNK         |      | [Hex]3[HexNac]5[Fuc]1          |
|            | 2+           | 1394.6893         | 1394.6415        | 34         | TIIVHLNK         |      | [Hex]3[HexNac]6[Fuc]1          |
|            | 2+           | 996.5012          | 996.4802         | 21         | TIIVHLNK         |      | [Hex]4[HexNac]2                |
|            | 2+           | 1069.5296         | 1069.5091        | 19         | TIIVHLNK         |      | [Hex]4[HexNac]2[Fuc]1          |
|            | 2+           | 1098.0471         | 1098.0198        | 25         | TIIVHLNK         |      | [Hex]4[HexNac]3                |
|            | 2+           | 1243.5482         | 1243.5675        | 16         | TIIVHLNK         |      | [Hex]4[HexNac]3[NeuNac]1       |
|            | 2+           | 1171.0464         | 1171.0488        | 2          | TIIVHLNK         |      | [Hex]4[HexNac]3[Fuc]1          |
|            | 2+           | 1272.5818         | 1272.5885        | 5          | TIIVHLNK         |      | [Hex]4[HexNac]4[Fuc]1          |
|            | 2+           | 1374.1820         | 1374.1281        | 39         | TIIVHLNK         |      | [Hex]4[HexNac]5[Fuc]1          |
|            | 2+           | 1475.7241         | 1475.6678        | 38         | TIIVHLNK         |      | [Hex]4[HexNac]6[Fuc]1          |
|            | 2+           | 1077.5315         | 1077.5065        | 23         | TIIVHLNK         |      | [Hex]5[HexNac]2                |
|            | 2+           | 1179.0788         | 1179.0463        | 28         | TIIVHLNK         |      | [Hex]5[HexNac]3                |
|            | 2+           | 1273.5971         | 1273.5781        | 15         | TIIVHLNK         | u    | [Hex]5[HexNac]3[Fuc]1          |
|            | 2+           | 1324.6427         | 1324.5939        | 37         | TIIVHLNK         |      | [Hex]5[HexNac]3[NeuNac]1       |
|            | 2+           | 1280.5825         | 1280.5859        | 3          | TIIVHLNK         |      | [Hex]5[HexNac]4                |
|            | 2+           | 1353.6611         | 1353.6149        | 34         | TIIVHLNK         |      | [Hex]5[HexNac]4[Fuc]1          |
|            | 2+           | 1455.2162         | 1455.1546        | 42         | TIIVHLNK         |      | [Hex]5[HexNac]5[Fuc]1          |
|            | 2+           | 1158.5623         | 1158.5330        | 25         | TIIVHLNK         |      | [Hex]6 [HexNac]2               |
|            | 2+           | 1260.1105         | 1260.0727        | 30         | TIIVHLNK         |      | [Hex]6[HexNac]3                |
|            | 2+           | 1536.2442         | 1536.1810        | 41         | TIIVHLNK         |      | [Hex]6[HexNac]5[Fuc]1          |
|            | 2+           | 1637.8065         | 1637.7207        | 52         | TIIVHLNK         |      | [Hex]6[HexNac]6[Fuc]1          |
|            | 2+           | 1239.5926         | 1239.5594        | 27         | TIIVHLNK         |      | [Hex]7[HexNac]2                |
|            | 2+           | 1442.6243         | 1442.6387        | 10         | TIIVHLNK         |      | [Hex]7[HexNac]4                |
|            | 2+           | 1718.8062         | 1718.7471        | 34         | TIIVHLNK         |      | [Hex]7[HexNac]6[Fuc]1          |
|            | 2+           | 1320.6260         | 1320.5858        | 30         | TIIVHLNK         |      | [Hex]8[HexNac]2                |
|            | 2+           | 1401.6595         | 1401.6122        | 34         | TIIVHLNK         |      | [Hex]9[HexNac]2                |
| V3         | 2+           | 1276.5904         | 1276.5737        | 13         | SVEIVCTRPNNNTR   |      | [Hex]3[HexNac]2                |
|            | 2+           | 1349.6405         | 1349.6027        | 28         | SVEIVCTRPNNNTR   |      | [Hex]3[HexNac]2[Fuc]1          |
|            | 2+           | 1378.1364         | 1378.1135        | 17         | SVEIVCTRPNNNTR   |      | [Hex]3[HexNac]3                |
|            | 2+           | 1451.1843         | 1451.1424        | 29         | SVEIVCTRPNNNTR   |      | [Hex]3[HexNac]3[Fuc]1          |
|            | 2+           | 1552.7354         | 1552.6821        | 34         | SVEIVCTRPNNNTR   |      | [Hex]3[HexNac]4[Fuc]1          |

| Env Domain | Charge State | Experimental Mass | Theoretical Mass | Mass Error | Peptide Sequence  | *Mod | Glycan Composition             |
|------------|--------------|-------------------|------------------|------------|-------------------|------|--------------------------------|
|            | 2+           | 1654.2851         | 1654.2218        | 38         | SVEIVCTRPNNNTR    |      | [Hex]3[HexNAc]5[Fuc]1          |
|            | 2+           | 1755.8392         | 1755.7615        | 44         | SVEIVCTRPNNNTR    |      | [Hex]3[HexNAc]6[Fuc]1          |
|            | 2+           | 1357.6521         | 1357.6002        | 38         | SVEIVCTRPNNNTR    |      | [Hex]4[HexNAc]2                |
|            | 2+           | 1430.6608         | 1430.6291        | 22         | SVEIVCTRPNNNTR    |      | [Hex]4[HexNAc]2[Fuc]1          |
|            | 2+           | 1459.1633         | 1459.1399        | 16         | SVEIVCTRPNNNTR    |      | [Hex]4[HexNAc]3                |
|            | 2+           | 1519.7144         | 1519.6530        | 40         | SVEIVCTRPNNNTR    |      | [Hex]4[HexNAc]3[Fuc]1          |
|            | 2+           | 1779.3263         | 1779.2562        | 39         | SVEIVCTRPNNNTR    |      | [Hex]4[HexNAc]4[Fuc]1[NeuNAc]1 |
|            | 2+           | 1735.3202         | 1735.2482        | 41         | SVEIVCTRPNNNTR    |      | [Hex]4[HexNAc]5[Fuc]1          |
|            | 2+           | 1836.8581         | 1836.7879        | 38         | SVEIVCTRPNNNTR    |      | [Hex]4[HexNAc]6[Fuc]1          |
|            | 2+           | 1438.6718         | 1438.6266        | 31         | SVEIVCTRPNNNTR    |      | [Hex]5[HexNAc]2                |
|            | 2+           | 1540.2219         | 1540.1663        | 36         | SVEIVCTRPNNNTR    |      | [Hex]5[HexNAc]3                |
|            | 2+           | 1685.7918         | 1685.7140        | 46         | SVEIVCTRPNNNTR    |      | [Hex]5[HexNAc]3 [NeuNAc]1      |
|            | 2+           | 1613.2550         | 1613.1952        | 37         | SVEIVCTRPNNNTR    |      | [Hex]5[HexNAc]3[Fuc]1          |
|            | 2+           | 1714.8037         | 1714.7349        | 40         | SVEIVCTRPNNNTR    |      | [Hex]5[HexNAc]4[Fuc]1          |
|            | 2+           | 1860.3649         | 1860.2826        | 44         | SVEIVCTRPNNNTR    |      | [Hex]5[HexNAc]4[Fuc]1[NeuNAc]1 |
|            | 2+           | 1816.3529         | 1816.2746        | 43         | SVEIVCTRPNNNTR    |      | [Hex]5[HexNAc]5[Fuc]1          |
|            | 2+           | 1532.2272         | 1532.1688        | 38         | SVEIVCTRPNNNTR    |      | [Hex]6[HexNAc]2                |
|            | 2+           | 1621.2623         | 1621.1927        | 43         | SVEIVCTRPNNNTR    |      | [Hex]6[HexNAc]3                |
|            | 2+           | 1694.3083         | 1694.2216        | 51         | SVEIVCTRPNNNTR    |      | [Hex]6[HexNAc]3[Fuc]1          |
|            | 2+           | 1766.8233         | 1766.7404        | 47         | SVEIVCTRPNNNTR    |      | [Hex]6[HexNAc]3[NeuNAc]1       |
|            | 2+           | 1897.3697         | 1897.3010        | 36         | SVEIVCTRPNNNTR    |      | [Hex]6[HexNAc]5[Fuc]1          |
|            | 2+           | 1998.9021         | 1998.8407        | 31         | SVEIVCTRPNNNTR    |      | [Hex]6[HexNAc]6[Fuc]1          |
|            | 2+           | 1600.7324         | 1600.6794        | 33         | SVEIVCTRPNNNTR    |      | [Hex]7[HexNAc]2                |
|            | 2+           | 1681.7540         | 1681.7058        | 29         | SVEIVCTRPNNNTR    |      | [Hex]8[HexNAc]2                |
|            | 2+           | 1762.7966         | 1762.7322        | 37         | SVEIVCTRPNNNTR    |      | [Hex]9[HexNAc]2                |
|            | 3+           | 1089.4754         | 1089.4748        | 0.6        | SVEIVCTRPNNNTR    |      | [Hex]4[HexNAc]4[Fuc]1          |
|            | 3+           | 1251.5655         | 1251.5276        | 30         | SVEIVCTRPNNNTR    |      | [Hex]7[HexNAc]4[Fuc]1          |
| V3-C3      | 2+           | 1172.4950         | 1172.4725        | 19         | QAYCNISGSK        |      | [Hex]5[HexNAc]2                |
|            | 2+           | 1253.5254         | 1253.4990        | 21         | QAYCNISGSK        |      | [Hex]6 [HexNAc]2               |
|            | 2+           | 1334.5520         | 1334.5254        | 20         | QAYCNISGSK        |      | [Hex]7[HexNAc]2                |
|            | 2+           | 1415.5828         | 1415.5518        | 22         | QAYCNISGSK        |      | [Hex]8[HexNAc]2                |
|            | 2+           | 1496.5630         | 1496.5782        | 10         | QAYCNISGSK        |      | [Hex]9[HexNAc]2                |
|            | 3+           | 1334.6001         | 1334.5698        | 23         | QAYCNISGSKWNETLKR |      | [Hex]7[HexNAc]4                |
|            | 3+           | 1388.6230         | 1388.5874        | 26         | QAYCNISGSKWNETLKR |      | [Hex]8[HexNAc]4                |
|            | 3+           | 1442.6330         | 1442.6050        | 19         | QAYCNISGSKWNETLKR |      | [Hex]9[HexNAc]4                |
|            | 3+           | 1496.6594         | 1496.6226        | 25         | QAYCNISGSKWNETLKR |      | [Hex]10[HexNAc]4               |
|            | 3+           | 1550.6893         | 1550.6402        | 32         | QAYCNISGSKWNETLKR |      | [Hex]11[HexNAc]4               |
|            | 3+           | 1604.7089         | 1604.6578        | 32         | QAYCNISGSKWNETLKR |      | [Hex]12[HexNAc]4               |
|            | 3+           | 1658.7397         | 1658.6754        | 39         | QAYCNISGSKWNETLKR |      | [Hex]13[HexNAc]4               |
|            | 3+           | 1712.7547         | 1712.6930        | 36         | QAYCNISGSKWNETLKR |      | [Hex]14[HexNAc]4               |
|            | 3+           | 1766.8082         | 1766.7106        | 55         | QAYCNISGSKWNETLKR |      | [Hex]15[HexNAc]4               |
|            | 3+           | 1820.8056         | 1820.7282        | 43         | QAYCNISGSKWNETLKR |      | [Hex]16[HexNAc]4               |
|            | 3+           | 1874.8961         | 1874.7459        | 80         | QAYCNISGSKWNETLKR |      | [Hex]17[HexNAc]4               |
|            | 3+           | 1928.8834         | 1928.7635        | 62         | QAYCNISGSKWNETLKR |      | [Hex]18[HexNAc]4               |
| C3         | 2+           | 919.9367          | 919.9175         | 21         | WNETLKR           |      | [Hex]3[HexNAc]2                |
|            | 2+           | 1123.0239         | 1122.9969        | 24         | WNETLKR           |      | [Hex]3[HexNAc]4                |
|            | 2+           | 1224.5699         | 1224.5366        | 27         | WNETLKR           |      | [Hex]3[HexNAc]5                |
|            | 2+           | 1399.1470         | 1399.1053        | 30         | WNETLKR           |      | [Hex]3[HexNAc]6[Fuc]1          |
|            | 2+           | 1204.0549         | 1204.0233        | 26         | WNETLKR           |      | [Hex]4 [HexNAc]4               |

| Env Domain | Charge State | Experimental Mass | Theoretical Mass | Mass Error | Peptide Sequence  | *Mod | Glycan Composition       |
|------------|--------------|-------------------|------------------|------------|-------------------|------|--------------------------|
|            | 2+           | 1000.9697         | 1000.9440        | 26         | WNETLKR           |      | [Hex]4[HexNAc]2          |
|            | 2+           | 1102.5087         | 1102.4836        | 23         | WNETLKR           |      | [Hex]4[HexNAc]3          |
|            | 2+           | 1305.6017         | 1305.5630        | 30         | WNETLKR           |      | [Hex]4[HexNAc]5          |
|            | 2+           | 1081.9945         | 1081.9703        | 22         | WNETLKR           |      | [Hex]5[HexNAc]2          |
|            | 2+           | 1183.5387         | 1183.5100        | 24         | WNETLKR           |      | [Hex]5 [HexNAc]3         |
|            | 2+           | 1285.0841         | 1285.0497        | 27         | WNETLKR           |      | [Hex]5[HexNAc]4          |
|            | 2+           | 1386.6634         | 1386.5894        | 53         | WNETLKR           |      | [Hex]5[HexNAc]5          |
|            | 2+           | 1163.0235         | 1162.9968        | 23         | WNETLKR           |      | [Hex]6 [HexNAc]2         |
|            | 2+           | 1264.5690         | 1264.5364        | 26         | WNETLKR           |      | [Hex]6[HexNAc]3          |
|            | 2+           | 1244.0543         | 1244.0232        | 25         | WNETLKR           |      | [Hex]7[HexNAc]2          |
|            | 2+           | 1345.5809         | 1345.5628        | 14         | WNETLKR           |      | [Hex]7[HexNAc]3          |
|            | 2+           | 1325.0836         | 1325.0496        | 26         | WNETLKR           |      | [Hex]8[HexNAc]2          |
|            | 2+           | 1406.1140         | 1406.0760        | 27         | WNETLKR           |      | [Hex]9[HexNAc]2          |
|            | 2+           | 1088.9757         | 1088.9543        | 20         | WNETLK            |      | [Hex]3[HexNAc]3[NeuNAc]1 |
|            | 2+           | 1451.1822         | 1451.1051        | 53         | WNETLK            |      | [Hex]3[HexNAc]8          |
|            | 2+           | 1024.4533         | 1024.4330        | 20         | WNETLK            |      | [Hex]4[HexNAc]3          |
|            | 2+           | 1105.4787         | 1105.4594        | 17         | WNETLK            |      | [Hex]5 [HexNAc]3         |
|            | 2+           | 1003.9372         | 1003.9197        | 17         | WNETLK            |      | [Hex]5[HexNAc]2          |
|            | 2+           | 1280.0909         | 1280.0281        | 49         | WNETLK            |      | [Hex]5[HexNAc]4[Fuc]1    |
|            | 2+           | 1186.5135         | 1186.4858        | 23         | WNETLK            |      | [Hex]6[HexNAc]3          |
|            | 2+           | 1165.9929         | 1165.9726        | 17         | WNETLK            |      | [Hex]7[HexNAc]2          |
|            | 2+           | 1246.9933         | 1246.9990        | 5          | WNETLK            |      | [Hex]8[HexNAc]2          |
|            | 2+           | 1328.0590         | 1328.0254        | 25         | WNETLK            |      | [Hex]9[HexNAc]2          |
| C3-V4      | 2+           | 1093.9657         | 1093.9383        | 25         | GEFFYCNTTR        |      | [Hex]3[HexNAc]2          |
|            | 2+           | 1166.9921         | 1166.9672        | 21         | GEFFYCNTTR        |      | [Hex]3[HexNAc]2[Fuc]1    |
|            | 2+           | 1195.5113         | 1195.4780        | 28         | GEFFYCNTTR        |      | [Hex]3[HexNAc]3          |
|            | 2+           | 1370.0910         | 1370.0466        | 32         | GEFFYCNTTR        |      | [Hex]3[HexNAc]4[Fuc]1    |
|            | 2+           | 1471.6524         | 1471.5863        | 45         | GEFFYCNTTR        |      | [Hex]3[HexNAc]5[Fuc]1    |
|            | 2+           | 1174.9952         | 1174.9647        | 26         | GEFFYCNTTR        |      | [Hex]4[HexNAc]2          |
|            | 2+           | 1248.0019         | 1248.9936        | 7          | GEFFYCNTTR        |      | [Hex]4[HexNAc]2[Fuc]1    |
|            | 2+           | 1276.5403         | 1276.5044        | 28         | GEFFYCNTTR        |      | [Hex]4[HexNAc]3          |
|            | 2+           | 1256.0260         | 1255.9911        | 28         | GEFFYCNTTR        |      | [Hex]5[HexNAc]2          |
|            | 2+           | 1357.5722         | 1357.5308        | 30         | GEFFYCNTTR        |      | [Hex]5[HexNAc]3          |
|            | 2+           | 1459.1171         | 1459.0705        | 32         | GEFFYCNTTR        |      | [Hex]5[HexNAc]4          |
|            | 2+           | 1532.1898         | 1532.0994        | 59         | GEFFYCNTTR        |      | [Hex]5[HexNAc]4[Fuc]1    |
|            | 2+           | 1337.0591         | 1337.0175        | 31         | GEFFYCNTTR        |      | [Hex]6[HexNAc]2          |
|            | 2+           | 1438.6049         | 1438.5572        | 33         | GEFFYCNTTR        |      | [Hex]6[HexNAc]3          |
|            | 2+           | 1584.1540         | 1584.1049        | 31         | GEFFYCNTTR        |      | [Hex]6[HexNAc]3[NeuNAc]1 |
|            | 2+           | 1418.0916         | 1418.0439        | 34         | GEFFYCNTTR        |      | [Hex]7[HexNAc]2          |
|            | 2+           | 1499.1256         | 1499.0703        | 37         | GEFFYCNTTR        |      | [Hex]8[HexNAc]2          |
|            | 2+           | 1580.1622         | 1580.0967        | 41         | GEFFYCNTTR        |      | [Hex]9[HexNAc]2          |
| V4         | 2+           | 1450.6851         | 1450.6342        | 35         | LFNNAATEDETITLPCR |      | [Hex]3[HexNAc]2          |
|            | 2+           | 1523.7186         | 1523.6632        | 36         | LFNNAATEDETITLPCR |      | [Hex]3[HexNAc]2[Fuc]1    |
|            | 2+           | 1625.2556         | 1625.2029        | 32         | LFNNAATEDETITLPCR |      | [Hex]3[HexNAc]3[Fuc]1    |
|            | 2+           | 1552.1417         | 1552.1739        | 21         | LFNNAATEDETITLPCR |      | [Hex]3[HexNAc]3          |
|            | 2+           | 1645.7652         | 1645.7162        | 30         | LFNNAATEDETITLPCR |      | [Hex]3[HexNAc]4          |
|            | 2+           | 1726.8106         | 1726.7425        | 39         | LFNNAATEDETITLPCR |      | [Hex]3[HexNAc]4[Fuc]1    |
|            | 2+           | 1828.3565         | 1828.2823        | 41         | LFNNAATEDETITLPCR |      | [Hex]3[HexNAc]5[Fuc]1    |
|            | 2+           | 1929.9076         | 1929.8220        | 44         | LFNNAATEDETITLPCR |      | [Hex]3[HexNAc]6[Fuc]1    |
|            | 2+           | 1531.7085         | 1531.6607        | 31         | LFNNAATEDETITLPCR |      | [Hex]4[HexNAc]2          |
|            | 2+           | 1604.7392         | 1604.6896        | 31         | LFNNAATEDETITLPCR |      | [Hex]4[HexNAc]2[Fuc]1    |
|            | 2+           | 1633.2417         | 1633.2003        | 25         | LFNNAATEDETITLPCR |      | [Hex]4[HexNAc]3          |

| Env Domain | Charge State | Experimental Mass | Theoretical Mass | Mass Error | Peptide Sequence  | *Mod | Glycan Composition             |
|------------|--------------|-------------------|------------------|------------|-------------------|------|--------------------------------|
|            | 2+           | 1706.2875         | 1706.2293        | 34         | LFNNNATEDETITLPCR |      | [Hex]4[HexNAc]3[Fuc]1          |
|            | 2+           | 1734.7963         | 1734.7400        | 32         | LFNNNATEDETITLPCR |      | [Hex]4[HexNAc]4                |
|            | 2+           | 1807.7922         | 1807.7690        | 13         | LFNNNATEDETITLPCR |      | [Hex]4[HexNAc]4[Fuc]1          |
|            | 2+           | 1909.3931         | 1909.3086        | 44         | LFNNNATEDETITLPCR |      | [Hex]4[HexNAc]5[Fuc]1          |
|            | 2+           | 1612.7440         | 1612.6870        | 35         | LFNNNATEDETITLPCR |      | [Hex]5[HexNAc]2                |
|            | 2+           | 1714.2858         | 1714.2267        | 34         | LFNNNATEDETITLPCR |      | [Hex]5[HexNAc]3                |
|            | 2+           | 1859.8508         | 1859.7744        | 41         | LFNNNATEDETITLPCR |      | [Hex]5[HexNAc]3 [NeuNAc]1      |
|            | 2+           | 1787.3205         | 1787.2557        | 36         | LFNNNATEDETITLPCR |      | [Hex]5[HexNAc]3[Fuc]1          |
|            | 2+           | 1815.8237         | 1815.7664        | 32         | LFNNNATEDETITLPCR |      | [Hex]5[HexNAc]4                |
|            | 2+           | 1888.8723         | 1888.7954        | 41         | LFNNNATEDETITLPCR |      | [Hex]5[HexNAc]4[Fuc]1          |
|            | 2+           | 1990.4325         | 1990.3351        | 49         | LFNNNATEDETITLPCR |      | [Hex]5[HexNAc]5[Fuc]1          |
|            | 2+           | 1693.7797         | 1693.7135        | 39         | LFNNNATEDETITLPCR |      | [Hex]6 [HexNAc]2               |
|            | 2+           | 1795.3187         | 1795.2531        | 37         | LFNNNATEDETITLPCR |      | [Hex]6[HexNAc]3                |
|            | 2+           | 1940.8899         | 1940.8008        | 46         | LFNNNATEDETITLPCR |      | [Hex]6[HexNAc]3[NeuNAc]1       |
|            | 2+           | 1774.8088         | 1774.7399        | 39         | LFNNNATEDETITLPCR |      | [Hex]7[HexNAc]2                |
|            | 2+           | 1977.8640         | 1977.8192        | 23         | LFNNNATEDETITLPCR |      | [Hex]7[HexNAc]4                |
|            | 2+           | 1855.8297         | 1855.7663        | 34         | LFNNNATEDETITLPCR |      | [Hex]8[HexNAc]2                |
|            | 2+           | 1936.8764         | 1936.7927        | 43         | LFNNNATEDETITLPCR |      | [Hex]9[HexNAc]2                |
| C4         | 2+           | 1200.0686         | 1200.0344        | 28         | AMYAPPIAGNITCK    |      | [Hex]3[HexNAc]2                |
|            | 2+           | 1273.1003         | 1273.0634        | 29         | AMYAPPIAGNITCK    |      | [Hex]3[HexNAc]2[Fuc]1          |
|            | 2+           | 1301.6181         | 1301.5741        | 34         | AMYAPPIAGNITCK    |      | [Hex]3[HexNAc]3                |
|            | 2+           | 1374.6435         | 1374.6031        | 29         | AMYAPPIAGNITCK    |      | [Hex]3[HexNAc]3[Fuc]1          |
|            | 2+           | 1476.1918         | 1476.1427        | 33         | AMYAPPIAGNITCK    |      | [Hex]3[HexNAc]4[Fuc]1          |
|            | 2+           | 1577.7494         | 1577.6825        | 42         | AMYAPPIAGNITCK    |      | [Hex]3[HexNAc]5[Fuc]1          |
|            | 2+           | 1679.2974         | 1679.2221        | 45         | AMYAPPIAGNITCK    |      | [Hex]3[HexNAc]6[Fuc]1          |
|            | 2+           | 1281.1006         | 1281.0609        | 31         | AMYAPPIAGNITCK    |      | [Hex]4[HexNAc]2                |
|            | 2+           | 1354.1294         | 1354.0898        | 29         | AMYAPPIAGNITCK    |      | [Hex]4[HexNAc]2[Fuc]1          |
|            | 2+           | 1382.6351         | 1382.6005        | 25         | AMYAPPIAGNITCK    |      | [Hex]4[HexNAc]3                |
|            | 2+           | 1455.6522         | 1455.6294        | 16         | AMYAPPIAGNITCK    |      | [Hex]4[HexNAc]3[Fuc]1          |
|            | 2+           | 1601.1928         | 1601.1772        | 10         | AMYAPPIAGNITCK    |      | [Hex]4[HexNAc]3[Fuc]1[NeuNAc]1 |
|            | 2+           | 1557.1989         | 1557.1691        | 19         | AMYAPPIAGNITCK    |      | [Hex]4[HexNAc]4[Fuc]1          |
|            | 2+           | 1702.7136         | 1702.7168        | 2          | AMYAPPIAGNITCK    |      | [Hex]4[HexNAc]4[Fuc]1[NeuNAc]1 |
|            | 2+           | 1658.7412         | 1658.7088        | 20         | AMYAPPIAGNITCK    |      | [Hex]4[HexNAc]5[Fuc]1          |
|            | 2+           | 1804.3092         | 1804.2566        | 29         | AMYAPPIAGNITCK    |      | [Hex]4[HexNAc]5[Fuc]1[NeuNAc]1 |
|            | 2+           | 1362.1292         | 1362.0872        | 31         | AMYAPPIAGNITCK    |      | [Hex]5[HexNAc]2                |
|            | 2+           | 1463.6758         | 1463.6269        | 33         | AMYAPPIAGNITCK    |      | [Hex]5[HexNAc]3                |
|            | 2+           | 1536.6811         | 1536.6558        | 17         | AMYAPPIAGNITCK    |      | [Hex]5[HexNAc]3[Fuc]1          |
|            | 2+           | 1682.2059         | 1682.2035        | 1          | AMYAPPIAGNITCK    |      | [Hex]5[HexNAc]3[Fuc]1[NeuNAc]1 |
|            | 2+           | 1565.2205         | 1565.1666        | 34         | AMYAPPIAGNITCK    |      | [Hex]5[HexNAc]4                |
|            | 2+           | 1638.2647         | 1638.1956        | 42         | AMYAPPIAGNITCK    |      | [Hex]5[HexNAc]4[Fuc]1          |
|            | 2+           | 1783.8007         | 1783.7433        | 32         | AMYAPPIAGNITCK    |      | [Hex]5[HexNAc]4[Fuc]1[NeuNAc]1 |
|            | 2+           | 1739.8263         | 1739.7353        | 52         | AMYAPPIAGNITCK    |      | [Hex]5[HexNAc]5[Fuc]1          |
|            | 2+           | 1443.1611         | 1443.1137        | 33         | AMYAPPIAGNITCK    |      | [Hex]6[HexNAc]2                |
|            | 2+           | 1544.7135         | 1544.6533        | 39         | AMYAPPIAGNITCK    |      | [Hex]6[HexNAc]3                |
|            | 2+           | 1690.2101         | 1690.2010        | 5          | AMYAPPIAGNITCK    |      | [Hex]6[HexNAc]3[Fuc]1          |
|            | 2+           | 1820.8195         | 1820.7617        | 32         | AMYAPPIAGNITCK    |      | [Hex]6[HexNAc]5[Fuc]1          |
|            | 2+           | 1922.4336         | 1922.3014        | 69         | AMYAPPIAGNITCK    |      | [Hex]6[HexNAc]6[Fuc]1          |
|            | 2+           | 1524.1966         | 1524.1401        | 37         | AMYAPPIAGNITCK    |      | [Hex]7[HexNAc]2                |
|            | 2+           | 1605.2277         | 1605.1665        | 38         | AMYAPPIAGNITCK    |      | [Hex]8[HexNAc]2                |
|            | 2+           | 1686.2629         | 1686.1929        | 42         | AMYAPPIAGNITCK    |      | [Hex]9[HexNAc]2                |
|            | 2+           | 989.5169          | 989.4961         | 21         | SNITGLLLVR        |      | [Hex]3[HexNAc]2                |

| Env Domain | Charge State | Experimental Mass | Theoretical Mass | Mass Error | Peptide Sequence     | *Mod | Glycan Composition               |
|------------|--------------|-------------------|------------------|------------|----------------------|------|----------------------------------|
|            | 2+           | 1091.0551         | 1091.0358        | 18         | SNITGLLLVR           |      | [Hex]3[HexNAc]3                  |
|            | 2+           | 1164.0906         | 1164.0648        | 22         | SNITGLLLVR           |      | [Hex]3[HexNAc]3[Fuc]1            |
|            | 2+           | 1265.6380         | 1265.6044        | 27         | SNITGLLLVR           |      | [Hex]3[HexNAc]4[Fuc]1            |
|            | 2+           | 1367.1844         | 1367.1442        | 29         | SNITGLLLVR           |      | [Hex]3[HexNAc]5[Fuc]1            |
|            | 2+           | 1468.7285         | 1468.6839        | 30         | SNITGLLLVR           |      | [Hex]3[HexNAc]6[Fuc]1            |
|            | 2+           | 1070.5063         | 1070.5226        | 15         | SNITGLLLVR           |      | [Hex]4[HexNAc]2                  |
|            | 2+           | 1143.5409         | 1143.5515        | 9          | SNITGLLLVR           |      | [Hex]4[HexNAc]2[Fuc]1            |
|            | 2+           | 1172.0637         | 1172.0622        | 1          | SNITGLLLVR           |      | [Hex]4[HexNAc]3                  |
|            | 2+           | 1245.1227         | 1245.0912        | 25         | SNITGLLLVR           |      | [Hex]4[HexNAc]3[Fuc]1            |
|            | 2+           | 1346.6433         | 1346.6309        | 9          | SNITGLLLVR           |      | [Hex]4[HexNAc]4[Fuc]1            |
|            | 2+           | 1448.2194         | 1448.1705        | 34         | SNITGLLLVR           |      | [Hex]4[HexNAc]5[Fuc]1            |
|            | 2+           | 1151.5758         | 1151.5489        | 23         | SNITGLLLVR           |      | [Hex]5[HexNAc]2                  |
|            | 2+           | 1253.1304         | 1253.0886        | 33         | SNITGLLLVR           | for  | [Hex]5[HexNAc]3                  |
|            | 2+           | 1354.6676         | 1354.6283        | 29         | SNITGLLLVR           |      | [Hex]5[HexNAc]4                  |
|            | 2+           | 1427.7146         | 1427.6573        | 40         | SNITGLLLVR           |      | [Hex]5[HexNAc]4[Fuc]1            |
|            | 2+           | 1232.6060         | 1232.5754        | 25         | SNITGLLLVR           |      | [Hex]6[HexNAc]2                  |
|            | 2+           | 1334.1509         | 1334.1150        | 27         | SNITGLLLVR           |      | [Hex]6[HexNAc]3                  |
|            | 2+           | 1435.6395         | 1435.6547        | 11         | SNITGLLLVR           |      | [Hex]6[HexNAc]4                  |
|            | 2+           | 1421.1467         | 1421.1414        | 4          | SNITGLLLVR           |      | [Hex]6[HexNAc]3[Fuc]1            |
|            | 2+           | 1313.6385         | 1313.6018        | 28         | SNITGLLLVR           |      | [Hex]7[HexNAc]2                  |
|            | 2+           | 1394.6699         | 1394.6282        | 30         | SNITGLLLVR           |      | [Hex]8[HexNAc]2                  |
|            | 2+           | 1475.7002         | 1475.6546        | 31         | SNITGLLLVR           |      | [Hex]9[HexNAc]2                  |
| C4-V5      | 3+           | 1063.8152         | 1063.7889        | 25         | DGGEDNKTEEIFRPGGGNMK |      | [Hex]3[HexNAc]2[Fuc]1            |
|            | 3+           | 1131.5104         | 1131.4821        | 25         | DGGEDNKTEEIFRPGGGNMK |      | [Hex]3[HexNAc]3[Fuc]1            |
|            | 3+           | 1199.2089         | 1199.1752        | 28         | DGGEDNKTEEIFRPGGGNMK |      | [Hex]3[HexNAc]4[Fuc]1            |
|            | 3+           | 1239.5698         | 1239.5173        | 42         | DGGEDNKTEEIFRPGGGNMK |      | [Hex]3[HexNAc]5[Fuc]1            |
|            | 3+           | 1334.6035         | 1334.5615        | 31         | DGGEDNKTEEIFRPGGGNMK |      | [Hex]3[HexNAc]6[Fuc]1            |
|            | 3+           | 1069.1379         | 1069.1206        | 16         | DGGEDNKTEEIFRPGGGNMK |      | [Hex]4[HexNAc]2                  |
|            | 3+           | 1117.8079         | 1117.8065        | 1          | DGGEDNKTEEIFRPGGGNMK |      | [Hex]4[HexNAc]2[Fuc]1            |
|            | 3+           | 1185.5072         | 1185.4997        | 6          | DGGEDNKTEEIFRPGGGNMK |      | [Hex]4[HexNAc]3[Fuc]1            |
|            | 3+           | 1253.1859         | 1253.1928        | 6          | DGGEDNKTEEIFRPGGGNMK |      | [Hex]4[HexNAc]4[Fuc]1            |
|            | 3+           | 1307.2475         | 1307.2104        | 28         | DGGEDNKTEEIFRPGGGNMK |      | [Hex]4[HexNAc]5[Fuc]1            |
|            | 3+           | 1417.9376         | 1417.9177        | 14         | DGGEDNKTEEIFRPGGGNMK |      | [Hex]4 [HexNAc]5 [Fuc]1[NeuNAc]1 |
|            | 3+           | 1388.5921         | 1388.5790        | 9          | DGGEDNKTEEIFRPGGGNMK |      | [Hex]4[HexNAc]6[Fuc]1            |
|            | 3+           | 1436.9137         | 1436.9249        | 8          | DGGEDNKTEEIFRPGGGNMK |      | [Hex]4 [HexNAc]6[NeuNAc]1        |
|            | 3+           | 1388.5921         | 1388.5790        | 9          | DGGEDNKTEEIFRPGGGNMK |      | [Hex]4[HexNAc]6[Fuc]1            |
|            | 3+           | 1485.6349         | 1485.6109        | 16         | DGGEDNKTEEIFRPGGGNMK |      | [Hex]4 [HexNAc]6 [Fuc]1[NeuNAc]1 |
|            | 3+           | 1123.1648         | 1123.1382        | 24         | DGGEDNKTEEIFRPGGGNMK |      | [Hex]5[HexNAc]2                  |
|            | 3+           | 1266.9052         | 1266.8683        | 29         | DGGEDNKTEEIFRPGGGNMK |      | [Hex]5[HexNAc]4[Fuc]1            |
|            | 3+           | 1404.2641         | 1404.2422        | 16         | DGGEDNKTEEIFRPGGGNMK |      | [Hex]5 [HexNAc]4[Fuc]1[NeuNAc]1  |
|            | 3+           | 1374.9596         | 1374.9035        | 41         | DGGEDNKTEEIFRPGGGNMK |      | [Hex]5[HexNAc]5[Fuc]1            |
|            | 3+           | 1471.9661         | 1471.9353        | 21         | DGGEDNKTEEIFRPGGGNMK |      | [Hex]5[HexNAc]5 [Fuc]1[NeuNAc]1  |
|            | 3+           | 1177.2079         | 1177.1558        | 44         | DGGEDNKTEEIFRPGGGNMK |      | [Hex]6 [HexNAc]2                 |
|            | 3+           | 1341.8994         | 1341.8807        | 14         | DGGEDNKTEEIFRPGGGNMK |      | [Hex]6 [HexNAc]3[NeuNAc]1        |
|            | 3+           | 1428.9265         | 1428.9211        | 4          | DGGEDNKTEEIFRPGGGNMK |      | [Hex]6[HexNAc]5 [Fuc]1           |
|            | 3+           | 1525.9502         | 1525.9529        | 2          | DGGEDNKTEEIFRPGGGNMK |      | [Hex]6[HexNAc]5 [Fuc]1[NeuNAc]1  |
|            | 3+           | 1622.9501         | 1622.9847        | 21         | DGGEDNKTEEIFRPGGGNMK |      | [Hex]6[HexNAc]5 [Fuc]1[NeuNAc]2  |
|            | 3+           | 1496.6116         | 1496.6143        | 2          | DGGEDNKTEEIFRPGGGNMK |      | [Hex]6[HexNAc]6 [Fuc]1           |
|            | 3+           | 1593.6965         | 1593.6460        | 32         | DGGEDNKTEEIFRPGGGNMK |      | [Hex]6[HexNAc]6 [Fuc]1[NeuNAc]1  |
|            | 3+           | 1690.7330         | 1690.6779        | 33         | DGGEDNKTEEIFRPGGGNMK |      | [Hex]6[HexNAc]6 [Fuc]1[NeuNAc]2  |
|            | 3+           | 1564.3675         | 1564.3074        | 38         | DGGEDNKTEEIFRPGGGNMK |      | [Hex]6[HexNAc]7 [Fuc]1           |
|            | 3+           | 1661.3996         | 1661.3391        | 36         | DGGEDNKTEEIFRPGGGNMK |      | [Hex]6[HexNAc]7 [Fuc]1[NeuNAc]1  |
|            | 3+           | 1758.4192         | 1758.3710        | 27         | DGGEDNKTEEIFRPGGGNMK |      | [Hex]6[HexNAc]7 [Fuc]1[NeuNAc]2  |
|            | 3+           | 1231.2050         | 1231.1734        | 26         | DGGEDNKTEEIFRPGGGNMK |      | [Hex]7[HexNAc]2                  |



| Env Domain | Charge State | Experimental Mass | Theoretical Mass | Mass Error | Peptide Sequence           | *Mod | Glycan Composition               |
|------------|--------------|-------------------|------------------|------------|----------------------------|------|----------------------------------|
|            | 3+           | 1550.6927         | 1550.6319        | 39         | DGGEDNKTEEIFRPGGGNMK       |      | [Hex]7[HexNAc]6[Fuc]1            |
|            | 3+           | 1647.6790         | 1647.6637        | 9          | DGGEDNKTEEIFRPGGGNMK       |      | [Hex]7 [HexNAc]6 [Fuc]1[NeuNAc]1 |
|            | 3+           | 1744.7422         | 1744.6955        | 27         | DGGEDNKTEEIFRPGGGNMK       |      | [Hex]7[HexNAc]6 [Fuc]1[NeuNAc]2  |
|            | 3+           | 1618.4033         | 1618.3250        | 48         | DGGEDNKTEEIFRPGGGNMK       |      | [Hex]7[HexNAc]7[Fuc]1            |
|            | 3+           | 1285.1906         | 1285.1910        | 0.3        | DGGEDNKTEEIFRPGGGNMK       |      | [Hex]8[HexNAc]2                  |
|            | 3+           | 1672.4321         | 1672.3426        | 54         | DGGEDNKTEEIFRPGGGNMK       |      | [Hex]8 [HexNAc]7 [Fuc]1          |
|            | 3+           | 1769.4458         | 1769.3744        | 40         | DGGEDNKTEEIFRPGGGNMK       |      | [Hex]8[HexNAc]7[Fuc]1[NeuNAc]1   |
| TM         | 5+           | 1306.8553         | 1306.9383        | 64         | DQQLIWNMTWMEWDREIS NYTDIYR |      | [Hex]8[HexNAc]7 [Fuc]1           |
|            | 5+           | 1347.4741         | 1347.5542        | 59         | DQQLIWNMTWMEWDREIS NYTDIYR |      | [Hex]8[HexNAc]8 [Fuc]1           |
|            | 5+           | 1388.1090         | 1388.1701        | 44         | DQQLIWNMTWMEWDREIS NYTDIYR |      | [Hex]8[HexNAc]9 [Fuc]1           |
|            | 5+           | 1469.2638         | 1469.4018        | 94         | DQQLIWNMTWMEWDREIS NYTDIYR |      | [Hex]8[HexNAc]10[Fuc]1           |
|            | 5+           | 1509.9526         | 1510.0177        | 43         | DQQLIWNMTWMEWDREIS NYTDIYR |      | [Hex]8 [HexNAc]11[Fuc]1          |
|            | 5+           | 1550.5604         | 1550.6336        | 47         | DQQLIWNMTWMEWDREIS NYTDIYR |      | [Hex]8[HexNAc]12[Fuc]1           |

Supplementary Table 1B. MALDI-MS Glycopeptide Compositions for C.97ZA012 gp140 ΔCFI

| Env Domain | Charge State | Experimental Mass | Theoretical Mass | Mass Error | Peptide Sequence          | *Mod        | Glycan Composition     |                       |
|------------|--------------|-------------------|------------------|------------|---------------------------|-------------|------------------------|-----------------------|
| C1-V1      | 1+           | 2768.6375         | 2768.2626        | 135        | LTPLCVTLHCTNATFK          |             | [Hex]3[HexNAc]2        |                       |
|            | 1+           | 3117.8823         | 3117.3999        | 155        | LTPLCVTLHCTNATFK          |             | [Hex]3[HexNAc]3[Fuc]1  |                       |
|            | 1+           | 3320.1946         | 3320.4793        | 86         | LTPLCVTLHCTNATFK          |             | [Hex]3[HexNAc]4[Fuc]1  |                       |
|            | 1+           | 3523.3022         | 3523.5588        | 73         | LTPLCVTLHCTNATFK          |             | [Hex]3[HexNAc]5[Fuc]1  |                       |
|            | 1+           | 3726.9652         | 3726.6381        | 88         | LTPLCVTLHCTNATFK          |             | [Hex]3[HexNAc]6[Fuc]1  |                       |
|            | 1+           | 2930.6768         | 2930.3155        | 123        | LTPLCVTLHCTNATFK          |             | [Hex]4[HexNAc]2        |                       |
|            | 1+           | 3076.1462         | 3076.3734        | 74         | LTPLCVTLHCTNATFK          |             | [Hex]4[HexNAc]2[Fuc]1  |                       |
|            | 1+           | 3279.9219         | 3279.4527        | 143        | LTPLCVTLHCTNATFK          |             | [Hex]4[HexNAc]3[Fuc]1  |                       |
|            | 1+           | 3092.8499         | 3092.3683        | 156        | LTPLCVTLHCTNATFK          |             | [Hex]5[HexNAc]2        |                       |
|            | 1+           | 3441.1877         | 3441.5055        | 92         | LTPLCVTLHCTNATFK          |             | [Hex]5[HexNAc]3[Fuc]1  |                       |
|            | 1+           | 3254.7438         | 3254.4212        | 99         | LTPLCVTLHCTNATFK          |             | [Hex]6 [HexNAc]2       |                       |
|            | 1+           | 3457.9229         | 3457.5005        | 122        | LTPLCVTLHCTNATFK          |             | [Hex]6[HexNAc]3        |                       |
|            | 1+           | 3416.0220         | 3416.4740        | 132        | LTPLCVTLHCTNATFK          |             | [Hex]7[HexNAc]2        |                       |
|            | 1+           | 3577.8401         | 3578.5268        | 192        | LTPLCVTLHCTNATFK          |             | [Hex]8[HexNAc]2        |                       |
|            | 1+           | 3741.1541         | 3740.5795        | 154        | LTPLCVTLHCTNATFK          |             | [Hex]9[HexNAc]2        |                       |
|            | 1+           | 5593.8438         | 5595.8579        | 360        | LTPLCVTLHCTNATFKNNVTNDMNK |             | [Hex]6[HexNAc]7[Fuc]2  |                       |
|            | 1+           | 5796.7666         | 5799.0529        | 394        | LTPLCVTLHCTNATFKNNVTNDMNK |             | [Hex]6[HexNAc]8[Fuc]2  |                       |
|            | 1+           | 6000.4429         | 6002.2479        | 301        | LTPLCVTLHCTNATFKNNVTNDMNK |             | [Hex]6[HexNAc]9[Fuc]2  |                       |
|            | 1+           | 6204.2949         | 6205.4429        | 185        | LTPLCVTLHCTNATFKNNVTNDMNK |             | [Hex]6[HexNAc]10[Fuc]2 |                       |
|            | 1+           | 6408.4199         | 6408.6379        | 34         | LTPLCVTLHCTNATFKNNVTNDMNK |             | [Hex]6[HexNAc]11[Fuc]2 |                       |
|            | 1+           | 6609.8266         | 6611.8329        | 303        | LTPLCVTLHCTNATFKNNVTNDMNK |             | [Hex]6[HexNAc]12[Fuc]2 |                       |
|            | 1+           | 5002.2456         | 5002.2723        | 5          | LTPLCVTLHCTNATFKNNVTNDMNK |             | [Hex]7[HexNAc]4[Fuc]1  |                       |
|            | 1+           | 5609.7690         | 5611.8573        | 372        | LTPLCVTLHCTNATFKNNVTNDMNK |             | [Hex]7[HexNAc]7[Fuc]1  |                       |
|            | 1+           | 5812.6270         | 5815.0523        | 417        | LTPLCVTLHCTNATFKNNVTNDMNK |             | [Hex]7[HexNAc]8[Fuc]1  |                       |
|            | 1+           | 6016.3584         | 6018.2473        | 314        | LTPLCVTLHCTNATFKNNVTNDMNK |             | [Hex]7[HexNAc]9[Fuc]1  |                       |
|            | 1+           | 6218.3501         | 6221.4423        | 497        | LTPLCVTLHCTNATFKNNVTNDMNK |             | [Hex]7[HexNAc]10[Fuc]1 |                       |
|            | 1+           | 5365.9458         | 5367.6097        | 310        | LTPLCVTLHCTNATFKNNVTNDMNK |             | [Hex]8[HexNAc]5[Fuc]1  |                       |
|            | 1+           | 5569.0229         | 5570.8047        | 320        | LTPLCVTLHCTNATFKNNVTNDMNK |             | [Hex]8[HexNAc]6[Fuc]1  |                       |
|            | 1+           | 5772.4007         | 5773.9997        | 277        | LTPLCVTLHCTNATFKNNVTNDMNK |             | [Hex]8[HexNAc]7[Fuc]1  |                       |
|            | V1/V2        | 1+                | 2381.3403        | 2380.9807  | 151                       | NCSFNTTTEIR |                        | [Hex]3[HexNAc]2[Fuc]1 |
|            |              | 1+                | 2584.4363        | 2584.0601  | 146                       | NCSFNTTTEIR |                        | [Hex]3[HexNAc]3[Fuc]1 |
|            |              | 1+                | 2641.5129        | 2641.0815  | 163                       | NCSFNTTTEIR |                        | [Hex]3[HexNAc]4       |
|            |              | 1+                | 2786.9348        | 2787.1393  | 73                        | NCSFNTTTEIR |                        | [Hex]3[HexNAc]4[Fuc]1 |
| 1+         |              | 2990.6638         | 2990.2189        | 149        | NCSFNTTTEIR               |             | [Hex]3[HexNAc]5[Fuc]1  |                       |
| 1+         |              | 3193.7451         | 3193.2982        | 140        | NCSFNTTTEIR               |             | [Hex]3[HexNAc]6[Fuc]1  |                       |
| 1+         |              | 3396.8713         | 3396.3775        | 145        | NCSFNTTTEIR               |             | [Hex]3[HexNAc]7[Fuc]1  |                       |
| 1+         |              | 2397.3435         | 2396.9757        | 153        | NCSFNTTTEIR               |             | [Hex]4[HexNAc]2        |                       |
| 1+         |              | 3152.7612         | 3152.2715        | 155        | NCSFNTTTEIR               |             | [Hex]4[HexNAc]5[Fuc]1  |                       |
| 1+         |              | 3355.9355         | 3355.3510        | 174        | NCSFNTTTEIR               |             | [Hex]4[HexNAc]6[Fuc]1  |                       |
| 1+         |              | 2559.4106         | 2559.0284        | 149        | NCSFNTTTEIR               |             | [Hex]5[HexNAc]2        |                       |
| 1+         |              | 3111.6232         | 3111.2450        | 122        | NCSFNTTTEIR               |             | [Hex]5[HexNAc]4[Fuc]1  |                       |
| 1+         |              | 3314.6782         | 3314.3244        | 107        | NCSFNTTTEIR               |             | [Hex]5[HexNAc]5[Fuc]1  |                       |
| 1+         |              | 4638.5146         | 4637.8320        | 147        | NCSFNTTTEIR               |             | [Hex]6[HexNAc]10[Fuc]2 |                       |
| 1+         |              | 4841.7495         | 4840.9114        | 173        | NCSFNTTTEIR               |             | [Hex]6[HexNAc]11[Fuc]2 |                       |
| 1+         |              | 5043.6177         | 5046.9397        | 658        | NCSFNTTTEIR               |             | [Hex]6[HexNAc]12[Fuc]2 |                       |
| 1+         |              | 2721.5376         | 2721.0813        | 168        | NCSFNTTTEIR               |             | [Hex]6[HexNAc]2        |                       |
| 1+         |              | 3476.7881         | 3476.3773        | 118        | NCSFNTTTEIR               |             | [Hex]6[HexNAc]5[Fuc]1  |                       |
| 1+         |              | 3679.8981         | 3679.4566        | 120        | NCSFNTTTEIR               |             | [Hex]6[HexNAc]6[Fuc]1  |                       |
| 1+         |              | 3826.5186         | 3825.5145        | 262        | NCSFNTTTEIR               |             | [Hex]6[HexNAc]6[Fuc]2  |                       |

|       |    |           |           |     |                                 |                          |
|-------|----|-----------|-----------|-----|---------------------------------|--------------------------|
|       | 1+ | 4029.2298 | 4028.5939 | 158 | NCSFNTTTEIR                     | [Hex]6[HexNAc]7[Fuc]2    |
|       | 1+ | 4232.9280 | 4231.6733 | 297 | NCSFNTTTEIR                     | [Hex]6[HexNAc]8[Fuc]2    |
|       | 1+ | 4435.1451 | 4434.7527 | 88  | NCSFNTTTEIR                     | [Hex]6[HexNAc]9[Fuc]2    |
|       | 1+ | 2883.5496 | 2883.1341 | 144 | NCSFNTTTEIR                     | [Hex]7[HexNAc]2          |
|       | 1+ | 3841.9787 | 3841.5095 | 122 | NCSFNTTTEIR                     | [Hex]7[HexNAc]6[Fuc]1    |
|       | 1+ | 4045.1007 | 4044.5889 | 127 | NCSFNTTTEIR                     | [Hex]7[HexNAc]7[Fuc]1    |
|       | 1+ | 3045.6541 | 3045.1869 | 153 | NCSFNTTTEIR                     | [Hex]8[HexNAc]2          |
|       | 1+ | 3207.5246 | 3207.2396 | 89  | NCSFNTTTEIR                     | [Hex]9[HexNAc]2          |
|       | 1+ | 4717.7271 | 4717.8317 | 22  | NCSFNTTTEIR                     | [Hex]9[HexNAc]8[Fuc]2    |
|       | 1+ | 4854.6875 | 4854.8529 | 34  | NCSFNTTTEIR                     | [Hex]12[HexNAc]7[Fuc]1   |
|       | 1+ | 4854.7280 | 4854.8529 | 26  | NCSFNTTTEIR                     | [Hex]12[HexNAc]7[Fuc]1   |
|       | 1+ | 5057.9082 | 5057.9323 | 5   | NCSFNTTTEIR                     | [Hex]12[HexNAc]8[Fuc]1   |
|       | 1+ | 5017.2749 | 5016.9057 | 74  | NCSFNTTTEIR                     | [Hex]13[HexNAc]7[Fuc]1   |
|       | 1+ | 5178.5628 | 5178.9586 | 76  | NCSFNTTTEIR                     | [Hex]14[HexNAc]7[Fuc]1   |
| V2-C2 | 1+ | 6850.6270 | 6853.8645 | 472 | ENRNNNSNNSEYILINCNAST ITQACPK   | [Hex]9[HexNAc]9[Fuc]3    |
|       | 1+ | 7054.8477 | 7057.0595 | 313 | ENRNNNSNNSEYILINCNAST ITQACPK   | [Hex]9[HexNAc]10[Fuc]3   |
|       | 1+ | 7259.3809 | 7260.2545 | 120 | ENRNNNSNNSEYILINCNAST ITQACPK   | [Hex]9[HexNAc]11[Fuc]3   |
|       | 1+ | 7460.8887 | 7463.4495 | 343 | ENRNNNSNNSEYILINCNAST ITQACPK   | [Hex]9[HexNAc]12[Fuc]3   |
|       | 1+ | 7664.3257 | 7666.6445 | 302 | ENRNNNSNNSEYILINCNAST ITQACPK   | [Hex]9[HexNAc]13[Fuc]3   |
|       | 1+ | 7867.7725 | 7869.8395 | 263 | ENRNNNSNNSEYILINCNAST ITQACPK   | [Hex]9[HexNAc]14[Fuc]3   |
|       | 1+ | 8071.5049 | 8073.0345 | 189 | ENRNNNSNNSEYILINCNAST ITQACPK   | [Hex]9[HexNAc]15[[Fuc]3  |
|       | 1+ | 8234.1221 | 8235.1767 | 128 | ENRNNNSNNSEYILINCNAST ITQACPK   | [Hex]10[HexNAc]15[[Fuc]3 |
|       | 1+ | 8396.0820 | 8397.3193 | 147 | ENRNNNSNNSEYILINCNAST ITQACPK   | [Hex]11[HexNAc]15[[Fuc]3 |
|       | 1+ | 8558.0605 | 8559.4617 | 164 | ENRNNNSNNSEYILINCNAST ITQACPK   | [Hex]12[HexNAc]15[[Fuc]3 |
|       | 1+ | 8720.5313 | 8721.6041 | 123 | ENRNNNSNNSEYILINCNAST ITQACPK   | [Hex]13[HexNAc]15[[Fuc]3 |
|       | 1+ | 8274.6113 | 8274.1615 | 54  | ENRNNNSNNSEYILINCNAST ITQACPK   | [Hex]14[HexNAc]12[[Fuc]3 |
|       | 1+ | 8478.3398 | 8477.3565 | 116 | ENRNNNSNNSEYILINCNAST ITQACPK   | [Hex]14[HexNAc]13[[Fuc]3 |
|       | 1+ | 8681.7305 | 8680.5515 | 136 | ENRNNNSNNSEYILINCNAST ITQACPK   | [Hex]14[HexNAc]14[[Fuc]3 |
|       | 1+ | 8882.3887 | 8883.7465 | 153 | ENRNNNSNNSEYILINCNAST ITQACPK   | [Hex]14[HexNAc]15[[Fuc]3 |
|       | 1+ | 9085.4365 | 9086.9415 | 166 | ENRNNNSNNSEYILINCNAST ITQACPK   | [Hex]14[HexNAc]16[Fuc]3  |
|       | 1+ | 9288.9727 | 9290.1365 | 125 | ENRNNNSNNSEYILINCNAST ITQACPK   | [Hex]14[HexNAc]17[Fuc]3  |
|       | 1+ | 8638.5039 | 8639.4989 | 115 | ENRNNNSNNSEYILINCNAST ITQACPK   | [Hex]15[HexNAc]13[[Fuc]3 |
|       | 1+ | 8842.1719 | 8842.6939 | 59  | ENRNNNSNNSEYILINCNAST ITQACPK   | [Hex]15[HexNAc]14[[Fuc]3 |
|       | 1+ | 9043.9814 | 9045.8889 | 211 | ENRNNNSNNSEYILINCNAST ITQACPK   | [Hex]15[HexNAc]15[[Fuc]3 |
|       | 1+ | 9247.3203 | 9249.0939 | 192 | ENRNNNSNNSEYILINCNAST ITQACPK   | [Hex]15[HexNAc]16[Fuc]3  |
|       | 1+ | 9451.0400 | 9452.2789 | 131 | ENRNNNSNNSEYILINCNAST ITQACPK   | [Hex]15[HexNAc]17[Fuc]3  |
|       | 1+ | 9003.9785 | 9004.8363 | 95  | ENRNNNSNNSEYILINCNAST ITQACPK   | [Hex]16[HexNAc]14[[Fuc]3 |
|       | 1+ | 9206.9795 | 9208.0313 | 114 | ENRNNNSNNSEYILINCNAST ITQACPK   | [Hex]16[HexNAc]15[[Fuc]3 |
|       | 1+ | 9409.2471 | 9411.2263 | 210 | ENRNNNSNNSEYILINCNAST ITQACPK   | [Hex]16[HexNAc]16[Fuc]3  |
|       | 1+ | 9612.5127 | 9614.4213 | 199 | ENRNNNSNNSEYILINCNAST ITQACPK   | [Hex]16[HexNAc]17[Fuc]3  |
|       | 1+ | 9368.8691 | 9370.1737 | 139 | ENRNNNSNNSEYILINCNAST ITQACPK   | [Hex]17[HexNAc]15[[Fuc]3 |
|       | 1+ | 9573.3760 | 9573.3687 | 1   | ENRNNNSNNSEYILINCNAST ITQACPK   | [Hex]17[HexNAc]16[Fuc]3  |
|       | 1+ | 9533.1592 | 9532.3161 | 88  | ENRNNNSNNSEYILINCNAST ITQACPK   | [Hex]18[HexNAc]15[[Fuc]3 |
| C2    | 1+ | 6018.8848 | 6020.2857 | 233 | GPCNNVSTVQCTHGKIPVVSTQLLNGSLAEK | [Hex]11[HexNAc]4         |
|       | 1+ | 6180.7349 | 6182.4281 | 274 | GPCNNVSTVQCTHGKIPVVSTQLLNGSLAEK | [Hex]12[HexNAc]4         |
|       | 1+ | 6343.1597 | 6344.5705 | 222 | GPCNNVSTVQCTHGKIPVVSTQLLNGSLAEK | [Hex]13[HexNAc]4         |
|       | 1+ | 6509.2466 | 6506.7129 | 389 | GPCNNVSTVQCTHGKIPVVSTQLLNGSLAEK | [Hex]14[HexNAc]4         |
|       | 1+ | 6667.8735 | 6668.8553 | 147 | GPCNNVSTVQCTHGKIPVVSTQLLNGSLAEK | [Hex]15[HexNAc]4         |
|       | 1+ | 6830.0796 | 6830.9998 | 135 | GPCNNVSTVQCTHGKIPVVSTQLLNGSLAEK | [Hex]16[HexNAc]4         |
|       | 1+ | 6992.1899 | 6993.1401 | 136 | GPCNNVSTVQCTHGKIPVVSTQLLNGSLAEK | [Hex]17[HexNAc]4         |
|       | 1+ | 7154.3979 | 7155.2825 | 124 | GPCNNVSTVQCTHGKIPVVSTQLLNGSLAEK | [Hex]18[HexNAc]4         |
|       | 1+ | 2747.5952 | 2747.2489 | 126 | TIIVHLNK                        | [Hex]4[HexNAc]5[Fuc]1    |
|       | 1+ | 2762.5998 | 2763.2439 | 233 | TIIVHLNK                        | [Hex]5[HexNAc]5          |

| Env Domain | Charge State | Experimental Mass | Theoretical Mass | Mass Error | Peptide Sequence | *Mod | Glycan Composition    |
|------------|--------------|-------------------|------------------|------------|------------------|------|-----------------------|
|            | 1+           | 2909.5474         | 2909.3018        | 84         | TIIVHLNK         |      | [Hex]5[HexNAc]5[Fuc]1 |
|            | 1+           | 2802.6902         | 2802.2170        | 169        | TIIVHLNK         |      | [Hex]9[HexNAc]2       |
| C2-V3      | 1+           | 2552.3789         | 2552.1403        | 93         | SVEIVCTRPNNNTR   |      | [Hex]3[HexNAc]2       |
|            | 1+           | 2698.4282         | 2698.1982        | 85         | SVEIVCTRPNNNTR   |      | [Hex]3[HexNAc]2[Fuc]1 |
|            | 1+           | 2901.4927         | 2901.2776        | 74         | SVEIVCTRPNNNTR   |      | [Hex]3[HexNAc]3[Fuc]1 |
|            | 1+           | 3104.6260         | 3104.3569        | 87         | SVEIVCTRPNNNTR   |      | [Hex]3[HexNAc]4[Fuc]1 |
|            | 1+           | 3104.7175         | 3104.3569        | 116        | SVEIVCTRPNNNTR   |      | [Hex]3[HexNAc]4[Fuc]1 |
|            | 1+           | 3161.4487         | 3161.3783        | 22         | SVEIVCTRPNNNTR   |      | [Hex]3[HexNAc]5       |
|            | 1+           | 3307.7290         | 3307.4364        | 88         | SVEIVCTRPNNNTR   |      | [Hex]3[HexNAc]5[Fuc]1 |
|            | 1+           | 3364.1064         | 3364.4577        | 104        | SVEIVCTRPNNNTR   |      | [Hex]3[HexNAc]6       |
|            | 1+           | 3510.8657         | 3510.5158        | 100        | SVEIVCTRPNNNTR   |      | [Hex]3[HexNAc]6[Fuc]1 |
|            | 1+           | 2714.3630         | 2714.1932        | 63         | SVEIVCTRPNNNTR   |      | [Hex]4[HexNAc]2       |
|            | 1+           | 2860.4585         | 2860.2510        | 73         | SVEIVCTRPNNNTR   |      | [Hex]4[HexNAc]2[Fuc]1 |
|            | 1+           | 3063.5925         | 3063.3304        | 86         | SVEIVCTRPNNNTR   |      | [Hex]4[HexNAc]3[Fuc]1 |
|            | 1+           | 3323.4292         | 3323.4311        | 1          | SVEIVCTRPNNNTR   |      | [Hex]4[HexNAc]5       |
|            | 1+           | 3469.7898         | 3469.4891        | 87         | SVEIVCTRPNNNTR   |      | [Hex]4[HexNAc]5[Fuc]1 |
|            | 1+           | 2876.0778         | 2876.2457        | 58         | SVEIVCTRPNNNTR   |      | [Hex]5[HexNAc]2       |
|            | 1+           | 3079.6530         | 3079.3253        | 106        | SVEIVCTRPNNNTR   |      | [Hex]5[HexNAc]3       |
|            | 1+           | 3225.5913         | 3225.3832        | 65         | SVEIVCTRPNNNTR   |      | [Hex]5[HexNAc]3[Fuc]1 |
|            | 1+           | 3282.2622         | 3282.4045        | 43         | SVEIVCTRPNNNTR   |      | [Hex]5[HexNAc]4       |
|            | 1+           | 3428.7512         | 3428.4626        | 84         | SVEIVCTRPNNNTR   |      | [Hex]5[HexNAc]4[Fuc]1 |
|            | 1+           | 3631.8633         | 3631.5420        | 88         | SVEIVCTRPNNNTR   |      | [Hex]5[HexNAc]5[Fuc]1 |
|            | 1+           | 3834.9658         | 3834.6213        | 90         | SVEIVCTRPNNNTR   |      | [Hex]5[HexNAc]6[Fuc]1 |
|            | 1+           | 3038.5696         | 3038.2988        | 89         | SVEIVCTRPNNNTR   |      | [Hex]6[HexNAc]2       |
|            | 1+           | 3241.5649         | 3241.3781        | 58         | SVEIVCTRPNNNTR   |      | [Hex]6[HexNAc]3       |
|            | 1+           | 3647.5479         | 3647.5367        | 3          | SVEIVCTRPNNNTR   |      | [Hex]6[HexNAc]5       |
|            | 1+           | 3793.9846         | 3793.5948        | 103        | SVEIVCTRPNNNTR   |      | [Hex]6[HexNAc]5[Fuc]1 |
|            | 1+           | 3996.7792         | 3996.6742        | 26         | SVEIVCTRPNNNTR   |      | [Hex]6[HexNAc]6[Fuc]1 |
|            | 1+           | 3200.6902         | 3200.3516        | 106        | SVEIVCTRPNNNTR   |      | [Hex]7[HexNAc]2       |
|            | 1+           | 3630.9077         | 3631.5420        | 175        | SVEIVCTRPNNNTR   |      | [Hex]7[HexNAc]4       |
|            | 1+           | 4159.5445         | 4158.7270        | 197        | SVEIVCTRPNNNTR   |      | [Hex]7[HexNAc]6[Fuc]1 |
|            | 1+           | 3362.7129         | 3362.4044        | 92         | SVEIVCTRPNNNTR   |      | [Hex]8[HexNAc]2       |
|            | 1+           | 4377.6685         | 4377.8011        | 30         | SVEIVCTRPNNNTR   |      | [Hex]8[HexNAc]7       |
|            | 1+           | 3524.7378         | 3524.4572        | 80         | SVEIVCTRPNNNTR   |      | [Hex]9[HexNAc]2       |
|            | 1+           | 2680.4763         | 2680.2353        | 90         | SVEIVCTRPNNNTRK  |      | [Hex]3[HexNAc]2       |
|            | 1+           | 2826.6704         | 2826.2930        | 134        | SVEIVCTRPNNNTRK  |      | [Hex]3[HexNAc]2[Fuc]1 |
|            | 1+           | 3029.6438         | 3029.3724        | 90         | SVEIVCTRPNNNTRK  |      | [Hex]3[HexNAc]3[Fuc]1 |
|            | 1+           | 3232.6987         | 3232.4517        | 76         | SVEIVCTRPNNNTRK  |      | [Hex]3[HexNAc]4[Fuc]1 |
|            | 1+           | 3435.8384         | 3435.5312        | 89         | SVEIVCTRPNNNTRK  |      | [Hex]3[HexNAc]5[Fuc]1 |
|            | 1+           | 3492.9939         | 3492.5529        | 126        | SVEIVCTRPNNNTRK  |      | [Hex]3[HexNAc]6       |
|            | 1+           | 3638.9526         | 3638.6106        | 94         | SVEIVCTRPNNNTRK  |      | [Hex]3[HexNAc]6[Fuc]1 |
|            | 1+           | 2988.5857         | 2988.3460        | 80         | SVEIVCTRPNNNTRK  |      | [Hex]4[HexNAc]2[Fuc]1 |
|            | 1+           | 3191.7240         | 3191.4254        | 94         | SVEIVCTRPNNNTRK  |      | [Hex]4[HexNAc]3[Fuc]1 |
|            | 1+           | 3597.2867         | 3597.5839        | 83         | SVEIVCTRPNNNTRK  |      | [Hex]4[HexNAc]5[Fuc]1 |
|            | 1+           | 3004.5952         | 3004.3407        | 85         | SVEIVCTRPNNNTRK  |      | [Hex]5[HexNAc]2       |
|            | 1+           | 3354.0039         | 3353.4780        | 157        | SVEIVCTRPNNNTRK  |      | [Hex]5[HexNAc]3[Fuc]1 |
|            | 1+           | 3556.2683         | 3556.5574        | 81         | SVEIVCTRPNNNTRK  |      | [Hex]5[HexNAc]4[Fuc]1 |
|            | 1+           | 3613.4614         | 3613.5789        | 33         | SVEIVCTRPNNNTRK  |      | [Hex]5[HexNAc]5       |
|            | 1+           | 3760.0186         | 3759.6368        | 102        | SVEIVCTRPNNNTRK  |      | [Hex]5[HexNAc]5[Fuc]1 |
|            | 1+           | 3166.6555         | 3166.3936        | 83         | SVEIVCTRPNNNTRK  |      | [Hex]6[HexNAc]2       |
|            | 1+           | 3369.7590         | 3369.4731        | 85         | SVEIVCTRPNNNTRK  |      | [Hex]6[HexNAc]3       |
|            | 1+           | 3328.7400         | 3328.4464        | 88         | SVEIVCTRPNNNTRK  |      | [Hex]7[HexNAc]2       |
|            | 1+           | 3490.8054         | 3490.4992        | 88         | SVEIVCTRPNNNTRK  |      | [Hex]8[HexNAc]2       |

| Env Domain | Charge State | Experimental Mass | Theoretical Mass | Mass Error | Peptide Sequence | *Mod      | Glycan Composition    |                          |
|------------|--------------|-------------------|------------------|------------|------------------|-----------|-----------------------|--------------------------|
|            | 1+           | 3652.7300         | 3652.5520        | 49         | SVEIVCTRPNNNTRK  |           | [Hex]9[HexNAc]2       |                          |
| V3-C3      | 1+           | 2182.0459         | 2181.8850        | 74         | QAYCNISGSK       |           | [Hex]4[HexNAc]2       |                          |
|            | 1+           | 2343.9756         | 2343.9378        | 16         | QAYCNISGSK       |           | [Hex]5[HexNAc]2       |                          |
|            | 1+           | 2506.0266         | 2505.9907        | 14         | QAYCNISGSK       |           | [Hex]6 [HexNAc]2      |                          |
|            | 1+           | 2668.1257         | 2668.0435        | 31         | QAYCNISGSK       |           | [Hex]7[HexNAc]2       |                          |
|            | 1+           | 2830.1934         | 2830.0963        | 34         | QAYCNISGSK       |           | [Hex]8[HexNAc]2       |                          |
| C3         | 1+           | 1838.9613         | 1838.8277        | 73         | WNETLKR          |           | [Hex]3[HexNAc]2       |                          |
|            | 1+           | 1985.1536         | 1984.8856        | 135        | WNETLKR          |           | [Hex]3[HexNAc]2[Fuc]1 |                          |
|            | 1+           | 2042.1031         | 2041.9071        | 96         | WNETLKR          |           | [Hex]3[HexNAc]3       |                          |
|            | 1+           | 2188.1785         | 2187.9650        | 98         | WNETLKR          |           | [Hex]3[HexNAc]3[Fuc]1 |                          |
|            | 1+           | 2245.0957         | 2244.9864        | 49         | WNETLKR          |           | [Hex]3[HexNAc]4       |                          |
|            | 1+           | 2391.0015         | 2391.0443        | 18         | WNETLKR          |           | [Hex]3[HexNAc]4[Fuc]1 |                          |
|            | 1+           | 2447.9756         | 2448.0659        | 37         | WNETLKR          |           | [Hex]3[HexNAc]5       |                          |
|            | 1+           | 2593.9299         | 2594.1238        | 75         | WNETLKR          |           | [Hex]3[HexNAc]5[Fuc]1 |                          |
|            | 1+           | 2797.3740         | 2797.2032        | 61         | WNETLKR          |           | [Hex]3[HexNAc]6[Fuc]1 |                          |
|            | 1+           | 2797.4727         | 2797.2032        | 96         | WNETLKR          |           | [Hex]3[HexNAc]6[Fuc]1 |                          |
|            | 1+           | 2000.8911         | 2000.8806        | 5          | WNETLKR          |           | [Hex]4[HexNAc]2       |                          |
|            | 1+           | 2204.0288         | 2203.9599        | 31         | WNETLKR          |           | [Hex]4[HexNAc]3       |                          |
|            | 1+           | 2350.1836         | 2350.0178        | 71         | WNETLKR          |           | [Hex]4[HexNAc]3[Fuc]1 |                          |
|            | 1+           | 2406.8362         | 2407.0393        | 84         | WNETLKR          |           | [Hex]4[HexNAc]4       |                          |
|            | 1+           | 2610.3003         | 2610.1187        | 70         | WNETLKR          |           | [Hex]4[HexNAc]5       |                          |
|            | 1+           | 2755.9500         | 2756.1765        | 82         | WNETLKR          |           | [Hex]4[HexNAc]5[Fuc]1 |                          |
|            | 1+           | 2162.9966         | 2162.9333        | 29         | WNETLKR          |           | [Hex]5[HexNAc]2       |                          |
|            | 1+           | 2366.0339         | 2366.0127        | 9          | WNETLKR          |           | [Hex]5[HexNAc]3       |                          |
|            | 1+           | 2569.0332         | 2569.0921        | 23         | WNETLKR          |           | [Hex]5[HexNAc]4       |                          |
|            | 1+           | 2715.3651         | 2715.1500        | 79         | WNETLKR          |           | [Hex]5[HexNAc]4[Fuc]1 |                          |
|            | 1+           | 2772.3098         | 2772.1715        | 50         | WNETLKR          |           | [Hex]5[HexNAc]5       |                          |
|            | 1+           | 2325.0457         | 2324.9862        | 26         | WNETLKR          |           | [Hex]6[HexNAc]2       |                          |
|            | 1+           | 2527.9797         | 2528.0655        | 34         | WNETLKR          |           | [Hex]6[HexNAc]3       |                          |
|            | 1+           | 2731.4769         | 2731.1449        | 122        | WNETLKR          |           | [Hex]6[HexNAc]4       |                          |
|            | 1+           | 3080.6221         | 3080.2833        | 110        | WNETLKR          |           | [Hex]6[HexNAc]5[Fuc]1 |                          |
|            | 1+           | 2487.0879         | 2487.0390        | 20         | WNETLKR          |           | [Hex]7[HexNAc]2       |                          |
|            | 1+           | 2648.8674         | 2649.0918        | 85         | WNETLKR          |           | [Hex]8[HexNAc]2       |                          |
|            | 1+           | 2811.4019         | 2811.1446        | 92         | WNETLKR          |           | [Hex]9[HexNAc]2       |                          |
|            | 1+           | 3420.4957         | 3420.3827        | 33         | WNETLKR          |           | [Hex]9[HexNAc]5       |                          |
|            | 1+           | 3566.7229         | 3566.4406        | 79         | WNETLKR          |           | [Hex]9[HexNAc]5[Fuc]1 |                          |
|            |              | 1+                | 2603.2473        | 2603.0494  | 76               | LQENYNNNK |                       | [Hex]3[HexNAc]4[Fuc]1Na1 |
|            |              | 1+                | 2806.4282        | 2806.1289  | 107              | LQENYNNNK |                       | [Hex]3[HexNAc]5[Fuc]1Na1 |
|            | 1+           | 2841.3701         | 2841.1678        | 71         | LQENYNNNK        |           | [Hex]3[HexNAc]6       |                          |
|            | 1+           | 2987.2815         | 2987.2257        | 19         | LQENYNNNK        |           | [Hex]3[HexNAc]6[Fuc]1 |                          |
|            | 1+           | 3266.5864         | 3267.2556        | 205        | LQENYNNNK        |           | [Hex]8[HexNAc]4Na1    |                          |
| C3-V4      | 1+           | 2187.1726         | 2186.8693        | 139        | GEFFYCNTR        |           | [Hex]3[HexNAc]2       |                          |
|            | 1+           | 2333.5029         | 2332.9271        | 247        | GEFFYCNTR        |           | [Hex]3[HexNAc]2[Fuc]1 |                          |
|            | 1+           | 2390.5481         | 2389.9487        | 251        | GEFFYCNTR        |           | [Hex]3[HexNAc]3       |                          |
|            | 1+           | 2536.3533         | 2536.0066        | 137        | GEFFYCNTR        |           | [Hex]3[HexNAc]3[Fuc]1 |                          |
|            | 1+           | 2593.6770         | 2593.0279        | 250        | GEFFYCNTR        |           | [Hex]3[HexNAc]4       |                          |
|            | 1+           | 2739.4827         | 2739.0859        | 145        | GEFFYCNTR        |           | [Hex]3[HexNAc]4[Fuc]1 |                          |
|            | 1+           | 2796.8623         | 2796.1074        | 270        | GEFFYCNTR        |           | [Hex]3[HexNAc]5       |                          |
|            | 1+           | 2942.5886         | 2942.1654        | 144        | GEFFYCNTR        |           | [Hex]3[HexNAc]5[Fuc]1 |                          |
|            | 1+           | 3145.6780         | 3145.2448        | 138        | GEFFYCNTR        |           | [Hex]3[HexNAc]6[Fuc]1 |                          |
|            | 1+           | 2349.2771         | 2348.9222        | 151        | GEFFYCNTR        |           | [Hex]4[HexNAc]2       |                          |

| Env Domain | Charge State | Experimental Mass | Theoretical Mass | Mass Error | Peptide Sequence  | *Mod | Glycan Composition       |
|------------|--------------|-------------------|------------------|------------|-------------------|------|--------------------------|
|            | 1+           | 2552.6560         | 2552.0014        | 257        | GEFFYCNTR         |      | [Hex]4[HexNAc]3          |
|            | 1+           | 2698.4495         | 2698.0594        | 145        | GEFFYCNTR         |      | [Hex]4[HexNAc]3[Fuc]1    |
|            | 1+           | 2741.4919         | 2741.0652        | 156        | GEFFYCNTR         |      | [Hex]4[HexNAc]3[Fuc]1    |
|            | 1+           | 2755.8064         | 2755.0808        | 263        | GEFFYCNTR         |      | [Hex]4 [HexNAc]4         |
|            | 1+           | 3104.6350         | 3104.2181        | 134        | GEFFYCNTR         |      | [Hex]4[HexNAc]5[Fuc]1    |
|            | 1+           | 2714.4368         | 2714.0543        | 141        | GEFFYCNTR         |      | [Hex]5 [HexNAc]3         |
|            | 1+           | 2511.3293         | 2510.9749        | 141        | GEFFYCNTR         |      | [Hex]5[HexNAc]2          |
|            | 1+           | 2860.4912         | 2860.1122        | 133        | GEFFYCNTR         |      | [Hex]5[HexNAc]3[Fuc]1    |
|            | 1+           | 2917.5767         | 2917.1337        | 152        | GEFFYCNTR         |      | [Hex]5[HexNAc]4          |
|            | 1+           | 3063.6741         | 3063.1916        | 158        | GEFFYCNTR         |      | [Hex]5[HexNAc]4[Fuc]1    |
|            | 1+           | 3309.7674         | 3309.2768        | 148        | GEFFYCNTR         |      | [Hex]5[HexNAc]5[Fuc]1    |
|            | 1+           | 2673.4072         | 2673.0278        | 142        | GEFFYCNTR         |      | [Hex]6 [HexNAc]2         |
|            | 1+           | 2876.5330         | 2876.1071        | 148        | GEFFYCNTR         |      | [Hex]6[HexNAc]3          |
|            | 1+           | 3631.1179         | 3631.4032        | 79         | GEFFYCNTR         |      | [Hex]6[HexNAc]6[Fuc]1    |
|            | 1+           | 3632.1548         | 3631.4032        | 207        | GEFFYCNTR         |      | [Hex]6[HexNAc]6[Fuc]1    |
|            | 1+           | 2835.4993         | 2835.0806        | 148        | GEFFYCNTR         |      | [Hex]7[HexNAc]2          |
|            | 1+           | 2997.5784         | 2997.1334        | 148        | GEFFYCNTR         |      | [Hex]8[HexNAc]2          |
|            | 1+           | 3159.6487         | 3159.1862        | 146        | GEFFYCNTR         |      | [Hex]9[HexNAc]2          |
| V4         | 1+           | 2900.5276         | 2900.2611        | 92         | LFNNNATEDETITLPCR |      | [Hex]3[HexNAc]2          |
|            | 1+           | 3046.4199         | 3046.3190        | 33         | LFNNNATEDETITLPCR |      | [Hex]3[HexNAc]2[Fuc]1    |
|            | 1+           | 3103.8704         | 3103.3405        | 171        | LFNNNATEDETITLPCR |      | [Hex]3[HexNAc]3          |
|            | 1+           | 3249.2292         | 3249.3984        | 52         | LFNNNATEDETITLPCR |      | [Hex]3[HexNAc]3[Fuc]1    |
|            | 1+           | 3306.9861         | 3306.4198        | 171        | LFNNNATEDETITLPCR |      | [Hex]3[HexNAc]4          |
|            | 1+           | 3452.8025         | 3452.4778        | 94         | LFNNNATEDETITLPCR |      | [Hex]3[HexNAc]4[Fuc]1    |
|            | 1+           | 3510.1169         | 3509.4993        | 176        | LFNNNATEDETITLPCR |      | [Hex]3[HexNAc]5          |
|            | 1+           | 3656.1543         | 3655.5573        | 163        | LFNNNATEDETITLPCR |      | [Hex]3[HexNAc]5[Fuc]1    |
|            | 1+           | 3859.2209         | 3858.6367        | 151        | LFNNNATEDETITLPCR |      | [Hex]3[HexNAc]6[Fuc]1    |
|            | 1+           | 3062.4072         | 3062.3140        | 30         | LFNNNATEDETITLPCR |      | [Hex]4[HexNAc]2          |
|            | 1+           | 3208.7675         | 3208.3718        | 123        | LFNNNATEDETITLPCR |      | [Hex]4[HexNAc]2[Fuc]1    |
|            | 1+           | 3265.9363         | 3265.3933        | 166        | LFNNNATEDETITLPCR |      | [Hex]4[HexNAc]3          |
|            | 1+           | 3412.0398         | 3411.4512        | 173        | LFNNNATEDETITLPCR |      | [Hex]4[HexNAc]3[Fuc]1    |
|            | 1+           | 3671.6765         | 3671.5521        | 34         | LFNNNATEDETITLPCR |      | [Hex]4[HexNAc]5          |
|            | 1+           | 3453.0308         | 3452.4778        | 160        | LFNNNATEDETITLPCR |      | [Hex]3[HexNAc]4[Fuc]1    |
|            | 1+           | 3224.9063         | 3224.3667        | 167        | LFNNNATEDETITLPCR |      | [Hex]5[HexNAc]2          |
|            | 1+           | 3428.0364         | 3427.4461        | 172        | LFNNNATEDETITLPCR |      | [Hex]5 [HexNAc]3         |
|            | 1+           | 3574.0920         | 3573.5040        | 165        | LFNNNATEDETITLPCR |      | [Hex]5[HexNAc]3[Fuc]1    |
|            | 1+           | 3631.0891         | 3630.5255        | 155        | LFNNNATEDETITLPCR |      | [Hex]5[HexNAc]4          |
|            | 1+           | 3776.3142         | 3776.5835        | 71         | LFNNNATEDETITLPCR |      | [Hex]5[HexNAc]4[Fuc]1    |
|            | 1+           | 3980.3579         | 3979.6629        | 175        | LFNNNATEDETITLPCR |      | [Hex]5[HexNAc]5[Fuc]1    |
|            | 1+           | 3386.0396         | 3386.4196        | 112        | LFNNNATEDETITLPCR |      | [Hex]6 [HexNAc]2         |
|            | 1+           | 3590.0857         | 3589.4989        | 163        | LFNNNATEDETITLPCR |      | [Hex]6[HexNAc]3          |
|            | 1+           | 4141.0903         | 4141.7157        | 151        | LFNNNATEDETITLPCR |      | [Hex]6[HexNAc]5[Fuc]1    |
|            | 1+           | 4343.9691         | 4344.7951        | 190        | LFNNNATEDETITLPCR |      | [Hex]6[HexNAc]6[Fuc]1    |
|            | 1+           | 3548.9461         | 3548.4725        | 133        | LFNNNATEDETITLPCR |      | [Hex]7[HexNAc]2          |
|            | 1+           | 4709.4824         | 4709.9272        | 94         | LFNNNATEDETITLPCR |      | [Hex]7[HexNAc]7[Fuc]1    |
|            | 1+           | 3711.2085         | 3710.5253        | 184        | LFNNNATEDETITLPCR |      | [Hex]8[HexNAc]2          |
|            | 1+           | 3873.2175         | 3872.5781        | 165        | LFNNNATEDETITLPCR |      | [Hex]9[HexNAc]2          |
| C4         | 1+           | 2769.7715         | 2770.1813        | 148        | AMYAPPIAGNITCK    |      | [Hex]3[HexNAc]3[Fuc]1Na1 |
|            | 1+           | 2973.9321         | 2973.2606        | 226        | AMYAPPIAGNITCK    |      | [Hex]3[HexNAc]4[Fuc]1Na1 |
|            | 1+           | 3154.8516         | 3154.3576        | 157        | AMYAPPIAGNITCK    |      | [Hex]3[HexNAc]5[Fuc]1    |
|            | 1+           | 3379.6811         | 3379.4169        | 78         | AMYAPPIAGNITCK    |      | [Hex]3[HexNAc]6[Fuc]1Na1 |
|            | 1+           | 3233.2175         | 3233.3590        | 44         | AMYAPPIAGNITCK    |      | [Hex]3[HexNAc]6Na1       |

| Env Domain | Charge State | Experimental Mass | Theoretical Mass | Mass Error | Peptide Sequence     | *Mod | Glycan Composition    |
|------------|--------------|-------------------|------------------|------------|----------------------|------|-----------------------|
|            | 1+           | 2561.5374         | 2561.1144        | 165        | AMYAPPIAGNITCK       |      | [Hex]4[HexNAc]2       |
|            | 1+           | 2786.7244         | 2786.1762        | 197        | AMYAPPIAGNITCK       |      | [Hex]4[HexNAc]3Na1    |
|            | 1+           | 3192.4608         | 3192.3350        | 39         | AMYAPPIAGNITCK       |      | [Hex]4[HexNAc]5Na1    |
|            | 1+           | 2723.5652         | 2723.1671        | 146        | AMYAPPIAGNITCK       |      | [Hex]5[HexNAc]2       |
|            | 1+           | 2885.6477         | 2885.2200        | 148        | AMYAPPIAGNITCK       |      | [Hex]6 [HexNAc]2      |
|            | 1+           | 3047.7236         | 3047.2727        | 148        | AMYAPPIAGNITCK       |      | [Hex]7[HexNAc]2       |
|            | 1+           | 3209.8840         | 3209.3255        | 174        | AMYAPPIAGNITCK       |      | [Hex]8[HexNAc]2       |
|            | 1+           | 3371.9814         | 3371.3784        | 179        | AMYAPPIAGNITCK       |      | [Hex]9[HexNAc]2       |
|            | 1+           | 2124.5337         | 2124.0428        | 231        | SNITGLLLVR           |      | [Hex]3[HexNAc]2[Fuc]1 |
|            | 1+           | 2181.6084         | 2181.0643        | 249        | SNITGLLLVR           |      | [Hex]3[HexNAc]3       |
|            | 1+           | 2327.5767         | 2327.1222        | 195        | SNITGLLLVR           |      | [Hex]3[HexNAc]3[Fuc]1 |
|            | 1+           | 2530.7100         | 2530.2015        | 201        | SNITGLLLVR           |      | [Hex]3[HexNAc]4[Fuc]1 |
|            | 1+           | 2733.8196         | 2733.2810        | 197        | SNITGLLLVR           |      | [Hex]3[HexNAc]5[Fuc]1 |
|            | 1+           | 2789.8621         | 2790.3025        | 158        | SNITGLLLVR           |      | [Hex]3[HexNAc]6       |
|            | 1+           | 2936.9146         | 2936.3604        | 189        | SNITGLLLVR           |      | [Hex]3[HexNAc]6[Fuc]1 |
|            | 1+           | 2139.6748         | 2140.0379        | 170        | SNITGLLLVR           |      | [Hex]4[HexNAc]2       |
|            | 1+           | 2343.6458         | 2343.1172        | 226        | SNITGLLLVR           |      | [Hex]4[HexNAc]3       |
|            | 1+           | 2488.7563         | 2489.1750        | 168        | SNITGLLLVR           |      | [Hex]4[HexNAc]3[Fuc]1 |
|            | 1+           | 2896.0383         | 2895.3338        | 243        | SNITGLLLVR           |      | [Hex]4[HexNAc]5[Fuc]1 |
|            | 1+           | 2302.6455         | 2302.0906        | 241        | SNITGLLLVR           |      | [Hex]5[HexNAc]2       |
|            | 1+           | 2505.6138         | 2505.1699        | 177        | SNITGLLLVR           |      | [Hex]5 [HexNAc]3      |
|            | 1+           | 2651.8623         | 2651.2279        | 239        | SNITGLLLVR           |      | [Hex]5[HexNAc]3[Fuc]1 |
|            | 1+           | 2853.7754         | 2854.3073        | 186        | SNITGLLLVR           |      | [Hex]5[HexNAc]4[Fuc]1 |
|            | 1+           | 2464.6006         | 2464.1434        | 186        | SNITGLLLVR           |      | [Hex]6 [HexNAc]2      |
|            | 1+           | 2667.7576         | 2667.2227        | 201        | SNITGLLLVR           |      | [Hex]6[HexNAc]3       |
|            | 1+           | 2813.9041         | 2813.2806        | 222        | SNITGLLLVR           |      | [Hex]6[HexNAc]3[Fuc]1 |
|            | 1+           | 3220.1550         | 3219.4394        | 222        | SNITGLLLVR           |      | [Hex]6[HexNAc]5[Fuc]1 |
|            | 1+           | 3277.0288         | 3276.4609        | 173        | SNITGLLLVR           |      | [Hex]6[HexNAc]6       |
|            | 1+           | 3423.3174         | 3422.5188        | 233        | SNITGLLLVR           |      | [Hex]6[HexNAc]6[Fuc]1 |
|            | 1+           | 2626.6946         | 2626.1962        | 190        | SNITGLLLVR           |      | [Hex]7[HexNAc]2       |
|            | 1+           | 3584.7815         | 3584.5716        | 59         | SNITGLLLVR           |      | [Hex]7[HexNAc]6[Fuc]1 |
|            | 1+           | 3787.0725         | 3787.6510        | 153        | SNITGLLLVR           |      | [Hex]7[HexNAc]7[Fuc]1 |
|            | 1+           | 2788.7981         | 2788.2490        | 197        | SNITGLLLVR           |      | [Hex]8[HexNAc]2       |
|            | 1+           | 2950.8735         | 2950.3018        | 194        | SNITGLLLVR           |      | [Hex]9[HexNAc]2       |
|            | 1+           | 3706.3682         | 3705.5979        | 208        | SNITGLLLVR           |      | [Hex]9[HexNAc]5[Fuc]1 |
| C4-V5      | 1+           | 3189.7012         | 3189.3522        | 109        | DGGEDNKTEEIFRPGGGNMK |      | [Hex]3[HexNAc]2[Fuc]1 |
|            | 1+           | 3392.9197         | 3392.4317        | 144        | DGGEDNKTEEIFRPGGGNMK |      | [Hex]3[HexNAc]3[Fuc]1 |
|            | 1+           | 3596.0244         | 3595.5109        | 143        | DGGEDNKTEEIFRPGGGNMK |      | [Hex]3[HexNAc]4[Fuc]1 |
|            | 1+           | 3799.1426         | 3798.5904        | 145        | DGGEDNKTEEIFRPGGGNMK |      | [Hex]3[HexNAc]5[Fuc]1 |
|            | 1+           | 4002.2839         | 4001.6698        | 153        | DGGEDNKTEEIFRPGGGNMK |      | [Hex]3[HexNAc]6[Fuc]1 |
|            | 1+           | 3205.6792         | 3205.3472        | 104        | DGGEDNKTEEIFRPGGGNMK |      | [Hex]4[HexNAc]2       |
|            | 1+           | 3409.1842         | 3408.4266        | 222        | DGGEDNKTEEIFRPGGGNMK |      | [Hex]4[HexNAc]3       |
|            | 1+           | 3611.7494         | 3611.5059        | 67         | DGGEDNKTEEIFRPGGGNMK |      | [Hex]4 [HexNAc]4      |
|            | 1+           | 3815.1971         | 3814.5853        | 160        | DGGEDNKTEEIFRPGGGNMK |      | [Hex]4[HexNAc]5       |
|            | 1+           | 3961.6841         | 3960.6432        | 263        | DGGEDNKTEEIFRPGGGNMK |      | [Hex]4[HexNAc]5[Fuc]1 |
|            | 1+           | 4164.3989         | 4163.7225        | 162        | DGGEDNKTEEIFRPGGGNMK |      | [Hex]4[HexNAc]6[Fuc]1 |
|            | 1+           | 3367.2325         | 3367.4000        | 50         | DGGEDNKTEEIFRPGGGNMK |      | [Hex]5[HexNAc]2       |
|            | 1+           | 3920.4485         | 3919.6166        | 212        | DGGEDNKTEEIFRPGGGNMK |      | [Hex]5[HexNAc]4[Fuc]1 |
|            | 1+           | 4123.4359         | 4122.6960        | 179        | DGGEDNKTEEIFRPGGGNMK |      | [Hex]5[HexNAc]5[Fuc]1 |
|            | 1+           | 4326.4136         | 4325.7753        | 148        | DGGEDNKTEEIFRPGGGNMK |      | [Hex]5[HexNAc]6[Fuc]1 |
|            | 1+           | 3529.9832         | 3529.4528        | 150        | DGGEDNKTEEIFRPGGGNMK |      | [Hex]6 [HexNAc]2      |
|            | 1+           | 4285.6850         | 4284.7488        | 218        | DGGEDNKTEEIFRPGGGNMK |      | [Hex]6[HexNAc]5[Fuc]1 |

| Env Domain | Charge State | Experimental Mass | Theoretical Mass | Mass Error | Peptide Sequence     | *Mod | Glycan Composition    |
|------------|--------------|-------------------|------------------|------------|----------------------|------|-----------------------|
|            | 1+           | 4488.3572         | 4487.8282        | 118        | DGGEDNKTEEIFRPGGGNMK |      | [Hex]6[HexNAc]6[Fuc]1 |
|            | 1+           | 3692.0520         | 3691.5056        | 148        | DGGEDNKTEEIFRPGGGNMK |      | [Hex]7[HexNAc]2       |
|            | 1+           | 3854.1699         | 3853.5584        | 159        | DGGEDNKTEEIFRPGGGNMK |      | [Hex]8[HexNAc]2       |
|            | 1+           | 4016.1549         | 4015.6112        | 135        | DGGEDNKTEEIFRPGGGNMK |      | [Hex]9[HexNAc]2       |



Supplementary Table 2A. LC/ESI-FTICR-MS Glycopeptide Compositions for C.CON gp140 ΔCF

| Env Domain | Charge State | Experimental Mass | Theoretical Mass | Mass Error                         | Peptide Sequence                   | Glycan Composition             |
|------------|--------------|-------------------|------------------|------------------------------------|------------------------------------|--------------------------------|
| C1         | 3+           | 1637.7817         | 1637.7389        | 26                                 | EVHNVWATHACVPTDPNPQE IVLENTENFNMWK | [Hex]3[HexNAc]2                |
|            | 3+           | 1686.4875         | 1686.4249        | 37                                 | EVHNVWATHACVPTDPNPQE IVLENTENFNMWK | [Hex]3[HexNAc]2[Fuc]1          |
|            | 3+           | 1961.8887         | 1961.8446        | 22                                 | EVHNVWATHACVPTDPNPQE IVLENTENFNMWK | [Hex]9[HexNAc]2                |
|            | 4+           | 1279.3563         | 1279.3259        | 24                                 | EVHNVWATHACVPTDPNPQE IVLENTENFNMWK | [Hex]3[HexNAc]3                |
|            | 4+           | 1315.8763         | 1315.8403        | 27                                 | EVHNVWATHACVPTDPNPQE IVLENTENFNMWK | [Hex]3[HexNAc]3[Fuc]1          |
|            | 4+           | 1366.6536         | 1366.6102        | 32                                 | EVHNVWATHACVPTDPNPQE IVLENTENFNMWK | [Hex]3[HexNAc]4[Fuc]1          |
|            | 4+           | 1366.6536         | 1366.6102        | 32                                 | EVHNVWATHACVPTDPNPQE IVLENTENFNMWK | [Hex]3[HexNAc]4[Fuc]1          |
|            | 4+           | 1417.4248         | 1417.3800        | 32                                 | EVHNVWATHACVPTDPNPQE IVLENTENFNMWK | [Hex]3[HexNAc]5[Fuc]1          |
|            | 4+           | 1417.4248         | 1417.3800        | 32                                 | EVHNVWATHACVPTDPNPQE IVLENTENFNMWK | [Hex]3[HexNAc]5[Fuc]1          |
|            | 4+           | 1468.2108         | 1468.1499        | 41                                 | EVHNVWATHACVPTDPNPQE IVLENTENFNMWK | [Hex]3[HexNAc]6[Fuc]1          |
|            | 4+           | 1269.0923         | 1269.0692        | 18                                 | EVHNVWATHACVPTDPNPQE IVLENTENFNMWK | [Hex]4[HexNAc]2                |
|            | 4+           | 1319.8695         | 1319.8391        | 23                                 | EVHNVWATHACVPTDPNPQE IVLENTENFNMWK | [Hex]4[HexNAc]3                |
|            | 4+           | 1356.3885         | 1356.3535        | 26                                 | EVHNVWATHACVPTDPNPQE IVLENTENFNMWK | [Hex]4[HexNAc]3[Fuc]1          |
|            | 4+           | 1370.6345         | 1370.6089        | 19                                 | EVHNVWATHACVPTDPNPQE IVLENTENFNMWK | [Hex]4[HexNAc]4                |
|            | 4+           | 1421.4125         | 1421.3788        | 24                                 | EVHNVWATHACVPTDPNPQE IVLENTENFNMWK | [Hex]4[HexNAc]5                |
|            | 4+           | 1457.9145         | 1457.8932        | 15                                 | EVHNVWATHACVPTDPNPQE IVLENTENFNMWK | [Hex]4[HexNAc]5[Fuc]1          |
|            | 4+           | 1360.3895         | 1360.3523        | 27                                 | EVHNVWATHACVPTDPNPQE IVLENTENFNMWK | [Hex]5 [HexNAc]3               |
|            | 4+           | 1309.6132         | 1309.5824        | 24                                 | EVHNVWATHACVPTDPNPQE IVLENTENFNMWK | [Hex]5[HexNAc]2                |
|            | 4+           | 1396.8993         | 1396.8667        | 23                                 | EVHNVWATHACVPTDPNPQE IVLENTENFNMWK | [Hex]5[HexNAc]3[Fuc]1          |
|            | 4+           | 1447.6770         | 1447.6366        | 28                                 | EVHNVWATHACVPTDPNPQE IVLENTENFNMWK | [Hex]5[HexNAc]4[Fuc]1          |
| 4+         | 1498.4549    | 1498.4064         | 32               | EVHNVWATHACVPTDPNPQE IVLENTENFNMWK | [Hex]5[HexNAc]5[Fuc]1              |                                |
| 4+         | 1350.1262    | 1350.0956         | 23               | EVHNVWATHACVPTDPNPQE IVLENTENFNMWK | [Hex]6 [HexNAc]2                   |                                |
| 4+         | 1437.4230    | 1437.3799         | 30               | EVHNVWATHACVPTDPNPQE IVLENTENFNMWK | [Hex]6[HexNAc]3[Fuc]1              |                                |
| 4+         | 1390.6477    | 1390.6088         | 28               | EVHNVWATHACVPTDPNPQE IVLENTENFNMWK | [Hex]7[HexNAc]2                    |                                |
| 4+         | 1431.1592    | 1431.1220         | 26               | EVHNVWATHACVPTDPNPQE IVLENTENFNMWK | [Hex]8[HexNAc]2                    |                                |
| V1/V2      | 2+           | 1225.5555         | 1225.5229        | 27                                 | NCSFNITTEL                         | [Hex]3[HexNAc]3                |
|            | 2+           | 1298.5895         | 1298.5519        | 29                                 | NCSFNITTEL                         | [Hex]3[HexNAc]3[Fuc]1          |
|            | 2+           | 1400.1331         | 1400.0915        | 30                                 | NCSFNITTEL                         | [Hex]3[HexNAc]4[Fuc]1          |
|            | 2+           | 1501.6802         | 1501.6313        | 33                                 | NCSFNITTEL                         | [Hex]3[HexNAc]5[Fuc]1          |
|            | 2+           | 1205.0422         | 1205.0097        | 27                                 | NCSFNITTEL                         | [Hex]4[HexNAc]2                |
|            | 2+           | 1306.5850         | 1306.5493        | 27                                 | NCSFNITTEL                         | [Hex]4[HexNAc]3                |
|            | 2+           | 1379.6094         | 1379.5783        | 23                                 | NCSFNITTEL                         | [Hex]4[HexNAc]3[Fuc]1          |
|            | 2+           | 1387.6170         | 1387.5757        | 30                                 | NCSFNITTEL                         | [Hex]5 [HexNAc]3               |
|            | 2+           | 1286.0717         | 1286.0360        | 28                                 | NCSFNITTEL                         | [Hex]5[HexNAc]2                |
|            | 2+           | 1468.6426         | 1468.6021        | 28                                 | NCSFNITTEL                         | [Hex]6[HexNAc]3                |
|            | 2+           | 1448.1323         | 1448.0889        | 30                                 | NCSFNITTEL                         | [Hex]7[HexNAc]2                |
|            | 2+           | 1529.1647         | 1529.1153        | 32                                 | NCSFNITTEL                         | [Hex]8[HexNAc]2                |
|            | 2+           | 1610.1965         | 1610.1417        | 34                                 | NCSFNITTEL                         | [Hex]9[HexNAc]2                |
| V2         | 2+           | 1321.6302         | 1321.5949        | 27                                 | LDIVPLNENNSYR                      | [Hex]3[HexNAc]3                |
|            | 2+           | 1394.6666         | 1394.6239        | 31                                 | LDIVPLNENNSYR                      | [Hex]3[HexNAc]3[Fuc]1          |
|            | 2+           | 1496.2114         | 1496.1635        | 32                                 | LDIVPLNENNSYR                      | [Hex]3[HexNAc]4[Fuc]1          |
|            | 2+           | 1597.7590         | 1597.7033        | 35                                 | LDIVPLNENNSYR                      | [Hex]3[HexNAc]5[Fuc]1          |
|            | 2+           | 1699.3060         | 1699.2430        | 37                                 | LDIVPLNENNSYR                      | [Hex]3[HexNAc]6[Fuc]1          |
|            | 2+           | 1301.1096         | 1301.0817        | 21                                 | LDIVPLNENNSYR                      | [Hex]4[HexNAc]2                |
|            | 2+           | 1475.6940         | 1475.6503        | 30                                 | LDIVPLNENNSYR                      | [Hex]4[HexNAc]3[Fuc]1          |
|            | 2+           | 1722.8026         | 1722.7377        | 38                                 | LDIVPLNENNSYR                      | [Hex]4[HexNAc]4[Fuc]1[NeuNAc]1 |
|            | 2+           | 1678.7942         | 1678.7296        | 38                                 | LDIVPLNENNSYR                      | [Hex]4[HexNAc]5[Fuc]1          |
|            | 2+           | 1824.3492         | 1824.2774        | 39                                 | LDIVPLNENNSYR                      | [Hex]4[HexNAc]5[Fuc]1[NeuNAc]1 |
|            | 2+           | 1925.8838         | 1925.8171        | 35                                 | LDIVPLNENNSYR                      | [Hex]4[HexNAc]6[Fuc]1[NeuNAc]1 |
|            | 2+           | 1483.6924         | 1483.6477        | 30                                 | LDIVPLNENNSYR                      | [Hex]5 [HexNAc]3               |

| Env Domain | Charge State | Experimental Mass | Theoretical Mass | Mass Error | Peptide Sequence                           | Glycan Composition             |
|------------|--------------|-------------------|------------------|------------|--------------------------------------------|--------------------------------|
|            | 2+           | 1382.1458         | 1382.1080        | 27         | LDIVPLNENNSYR                              | [Hex]5[HexNAc]2                |
|            | 2+           | 1658.2547         | 1658.2164        | 23         | LDIVPLNENNSYR                              | [Hex]5[HexNAc]4[Fuc]1          |
|            | 2+           | 1803.8317         | 1803.7641        | 37         | LDIVPLNENNSYR                              | [Hex]5[HexNAc]4[Fuc]1[NeuNAc]1 |
|            | 2+           | 1759.8231         | 1759.7561        | 38         | LDIVPLNENNSYR                              | [Hex]5[HexNAc]5[Fuc]1          |
|            | 2+           | 1905.3775         | 1905.3038        | 39         | LDIVPLNENNSYR                              | [Hex]5[HexNAc]5[Fuc]1[NeuNAc]1 |
|            | 2+           | 1463.1772         | 1463.1345        | 29         | LDIVPLNENNSYR                              | [Hex]6[HexNAc]2                |
|            | 2+           | 1986.4237         | 1986.3302        | 47         | LDIVPLNENNSYR                              | [Hex]6[HexNAc]5[Fuc]1[NeuNAc]1 |
| V2-C2      | 2+           | 1292.1111         | 1292.0747        | 28         | LINCNTSAITQACPK                            | [Hex]3[HexNAc]2                |
|            | 2+           | 1365.1343         | 1365.1037        | 22         | LINCNTSAITQACPK                            | [Hex]3[HexNAc]2[Fuc]1          |
|            | 2+           | 1393.6633         | 1393.6144        | 35         | LINCNTSAITQACPK                            | [Hex]3[HexNAc]3                |
|            | 2+           | 1466.6869         | 1466.6434        | 30         | LINCNTSAITQACPK                            | [Hex]3[HexNAc]3[Fuc]1          |
|            | 2+           | 1568.2372         | 1568.183         | 35         | LINCNTSAITQACPK                            | [Hex]3[HexNAc]4[Fuc]1          |
|            | 2+           | 1669.7893         | 1669.7228        | 40         | LINCNTSAITQACPK                            | [Hex]3[HexNAc]5[Fuc]1          |
|            | 2+           | 1771.3388         | 1771.2625        | 43         | LINCNTSAITQACPK                            | [Hex]3[HexNAc]6[Fuc]1          |
|            | 2+           | 1373.1427         | 1373.1012        | 30         | LINCNTSAITQACPK                            | [Hex]4[HexNAc]2                |
|            | 2+           | 1446.1651         | 1446.1301        | 24         | LINCNTSAITQACPK                            | [Hex]4[HexNAc]2[Fuc]1          |
|            | 2+           | 1474.6872         | 1474.6408        | 31         | LINCNTSAITQACPK                            | [Hex]4[HexNAc]3                |
|            | 2+           | 1547.7246         | 1547.6698        | 35         | LINCNTSAITQACPK                            | [Hex]4[HexNAc]3[Fuc]1          |
|            | 2+           | 1693.2758         | 1693.2175        | 34         | LINCNTSAITQACPK                            | [Hex]4[HexNAc]3[Fuc]1[NeuNAc]1 |
|            | 2+           | 1794.8353         | 1794.7572        | 44         | LINCNTSAITQACPK                            | [Hex]4[HexNAc]4[Fuc]1[NeuNAc]1 |
|            | 2+           | 1750.8233         | 1750.7491        | 42         | LINCNTSAITQACPK                            | [Hex]4[HexNAc]5[Fuc]1          |
|            | 2+           | 1896.3878         | 1896.2969        | 48         | LINCNTSAITQACPK                            | [Hex]4[HexNAc]5[Fuc]1[NeuNAc]1 |
|            | 2+           | 1997.9343         | 1997.8366        | 49         | LINCNTSAITQACPK                            | [Hex]4[HexNAc]6[Fuc]1[NeuNAc]1 |
|            | 2+           | 1555.7226         | 1555.6672        | 36         | LINCNTSAITQACPK                            | [Hex]5[HexNAc]3                |
|            | 2+           | 1701.2466         | 1701.2149        | 19         | LINCNTSAITQACPK                            | [Hex]5[HexNAc]3[NeuNAc]1       |
|            | 2+           | 1454.1729         | 1454.1275        | 31         | LINCNTSAITQACPK                            | [Hex]5[HexNAc]2                |
|            | 2+           | 1628.7583         | 1628.6962        | 38         | LINCNTSAITQACPK                            | [Hex]5[HexNAc]3[Fuc]1          |
|            | 2+           | 1730.3086         | 1730.2359        | 42         | LINCNTSAITQACPK                            | [Hex]5[HexNAc]4[Fuc]1          |
|            | 3+           | 1250.9090         | 1250.8582        | 41         | LINCNTSAITQACPK                            | [Hex]5[HexNAc]4[Fuc]1[NeuNAc]1 |
|            | 2+           | 1831.8468         | 1831.7756        | 39         | LINCNTSAITQACPK                            | [Hex]5[HexNAc]5[Fuc]1          |
|            | 2+           | 1977.4281         | 1977.3233        | 53         | LINCNTSAITQACPK                            | [Hex]5[HexNAc]5[Fuc]1[NeuNAc]1 |
|            | 2+           | 1535.2032         | 1535.1540        | 32         | LINCNTSAITQACPK                            | [Hex]6[HexNAc]2                |
|            | 2+           | 1636.7577         | 1636.6936        | 39         | LINCNTSAITQACPK                            | [Hex]6[HexNAc]3                |
|            | 2+           | 1782.3187         | 1782.2413        | 43         | LINCNTSAITQACPK                            | [Hex]6[HexNAc]3[NeuNAc]1       |
|            | 2+           | 1912.8654         | 1912.802         | 33         | LINCNTSAITQACPK                            | [Hex]6[HexNAc]5[Fuc]1          |
|            | 3+           | 1372.6442         | 1372.5689        | 55         | LINCNTSAITQACPK                            | [Hex]6[HexNAc]5[Fuc]1[NeuNAc]1 |
|            | 2+           | 1616.2393         | 1616.1804        | 36         | LINCNTSAITQACPK                            | [Hex]7[HexNAc]2                |
|            | 3+           | 1131.8211         | 1131.8070        | 12         | LINCNTSAITQACPK                            | [Hex]8[HexNAc]2                |
|            | 3+           | 1185.8461         | 1185.8246        | 18         | LINCNTSAITQACPK                            | [Hex]9[HexNAc]2                |
| C2         | 2+           | 957.3676          | 957.3561         | 12         | CNNK                                       | [Hex]6[HexNAc]2                |
|            | 2+           | 1038.4032         | 1038.3825        | 20         | CNNK                                       | [Hex]7[HexNAc]2                |
|            | 2+           | 1119.4129         | 1119.4089        | 4          | CNNK                                       | [Hex]8[HexNAc]2                |
|            | 2+           | 1200.4354         | 1200.4353        | 0          | CNNK                                       | [Hex]9[HexNAc]2                |
|            | 5+           | 1871.0864         | 1870.9991        | 47         | TFNGTGPCNNVSTVQCTHGIKPVVSTQLLLNGSLAEEIIIIR | [Hex]22[HexNAc]6               |
|            | 5+           | 1903.4922         | 1903.4097        | 43         | TFNGTGPCNNVSTVQCTHGIKPVVSTQLLLNGSLAEEIIIIR | [Hex]23[HexNAc]6               |
|            | 5+           | 1935.7390         | 1935.8873        | 77         | TFNGTGPCNNVSTVQCTHGIKPVVSTQLLLNGSLAEEIIIIR | [Hex]24[HexNAc]6               |
|            | 5+           | 1968.2308         | 1968.2308        | 81         | TFNGTGPCNNVSTVQCTHGIKPVVSTQLLLNGSLAEEIIIIR | [Hex]25[HexNAc]6               |
|            | 2+           | 1205.5285         | 1205.4973        | 26         | SENLTNNAK                                  | [Hex]5[HexNAc]3                |
|            | 2+           | 1103.9802         | 1103.9576        | 20         | SENLTNNAK                                  | [Hex]5[HexNAc]2                |
|            | 2+           | 1307.0849         | 1307.0370        | 37         | SENLTNNAK                                  | [Hex]5[HexNAc]4                |
|            | 2+           | 1185.0102         | 1184.9840        | 22         | SENLTNNAK                                  | [Hex]6[HexNAc]2                |

| Env Domain | Charge State | Experimental Mass | Theoretical Mass | Mass Error | Peptide Sequence       | Glycan Composition             |
|------------|--------------|-------------------|------------------|------------|------------------------|--------------------------------|
|            | 2+           | 1286.5566         | 1286.5237        | 26         | SENLTNNAK              | [Hex]6[HexNAc]3                |
|            | 2+           | 1266.0386         | 1266.0104        | 22         | SENLTNNAK              | [Hex]7[HexNAc]2                |
|            | 2+           | 1347.0704         | 1347.0368        | 25         | SENLTNNAK              | [Hex]8[HexNAc]2                |
|            | 2+           | 1428.1165         | 1428.0632        | 37         | SENLTNNAK              | [Hex]9[HexNAc]2                |
| C2-V3      | 3+           | 1995.5054         | 1995.5043        | 1          | TIIVHLNESVEIVCTRPNNNTR | [Hex]16[HexNAc]4               |
|            | 3+           | 1941.4575         | 1941.4872        | 15         | TIIVHLNESVEIVCTRPNNNTR | [Hex]15[HexNAc]4               |
|            | 3+           | 1887.4963         | 1887.4691        | 14         | TIIVHLNESVEIVCTRPNNNTR | [Hex]14[HexNAc]4               |
|            | 3+           | 1833.4542         | 1833.4515        | 1          | TIIVHLNESVEIVCTRPNNNTR | [Hex]13[HexNAc]4               |
|            | 3+           | 1779.512          | 1779.4334        | 44         | TIIVHLNESVEIVCTRPNNNTR | [Hex]12[HexNAc]4               |
|            | 3+           | 1725.4309         | 1725.4163        | 8          | TIIVHLNESVEIVCTRPNNNTR | [Hex]11[HexNAc]4               |
|            | 3+           | 1725.5099         | 1725.4163        | 54         | TIIVHLNESVEIVCTRPNNNTR | [Hex]11[HexNAc]4               |
|            | 3+           | 1671.4459         | 1671.3987        | 28         | TIIVHLNESVEIVCTRPNNNTR | [Hex]10[HexNAc]4               |
| V3-C3      | 3+           | 1462.6507         | 1462.9032        | 173        | QAHCNISEDKWVK          | [Hex]12[HexNAc]4               |
|            | 3+           | 1516.9489         | 1516.9208        | 19         | QAHCNISEDKWVK          | [Hex]13[HexNAc]4               |
|            | 3+           | 1570.9668         | 1570.9384        | 18         | QAHCNISEDKWVK          | [Hex]14[HexNAc]4               |
|            | 3+           | 1624.9948         | 1624.9560        | 24         | QAHCNISEDKWVK          | [Hex]15[HexNAc]4               |
|            | 3+           | 1679.0208         | 1678.9736        | 28         | QAHCNISEDKWVK          | [Hex]16[HexNAc]4               |
|            | 3+           | 1733.0442         | 1732.9913        | 31         | QAHCNISEDKWVK          | [Hex]17[HexNAc]4               |
|            | 3+           | 1787.1003         | 1787.0089        | 51         | QAHCNISEDKWVK          | [Hex]18[HexNAc]4               |
| C3         | 2+           | 1229.0829         | 1229.0493        | 27         | LKEHFPNK               | [Hex]3[HexNAc]4[Fuc]1          |
|            | 2+           | 1208.5705         | 1208.5360        | 29         | LKEHFPNK               | [Hex]4[HexNAc]3[Fuc]1          |
|            | 2+           | 1115.0203         | 1114.9938        | 24         | LKEHFPNK               | [Hex]5[HexNAc]2                |
|            | 2+           | 1196.0593         | 1196.0202        | 33         | LKEHFPNK               | [Hex]6 [HexNAc]2               |
|            | 2+           | 1297.6148         | 1297.5599        | 42         | LKEHFPNK               | [Hex]6[HexNAc]3                |
|            | 2+           | 1399.1049         | 1399.0996        | 4          | LKEHFPNK               | [Hex]6[HexNAc]4                |
|            | 2+           | 1277.0843         | 1277.0466        | 30         | LKEHFPNK               | [Hex]7[HexNAc]2                |
|            | 2+           | 1358.1112         | 1358.0730        | 28         | LKEHFPNK               | [Hex]8[HexNAc]2                |
|            | 2+           | 1439.1392         | 1439.0994        | 28         | LKEHFPNK               | [Hex]9[HexNAc]2                |
|            | 3+           | 866.0968          | 866.0844         | 14         | LKEHFPNKTIK            | [Hex]3[HexNAc]3[Fuc]1          |
|            | 3+           | 1001.4924         | 1001.4707        | 22         | LKEHFPNKTIK            | [Hex]3[HexNAc]5[Fuc]1          |
|            | 3+           | 1069.1863         | 1069.1638        | 21         | LKEHFPNKTIK            | [Hex]3[HexNAc]6[Fuc]1          |
|            | 2+           | 1379.6918         | 1379.6494        | 31         | LKEHFPNKTIK            | [Hex]4[HexNAc]3[Fuc]1          |
|            | 3+           | 1055.5118         | 1055.4882        | 22         | LKEHFPNKTIK            | [Hex]4[HexNAc]5[Fuc]1          |
|            | 2+           | 1460.6868         | 1460.6758        | 8          | LKEHFPNKTIK            | [Hex]5[HexNAc]3[Fuc]1          |
|            | 3+           | 1041.8371         | 1041.8127        | 23         | LKEHFPNKTIK            | [Hex]5[HexNAc]4[Fuc]1          |
|            | 3+           | 1109.5338         | 1109.5059        | 25         | LKEHFPNKTIK            | [Hex]5[HexNAc]5[Fuc]1          |
|            | 3+           | 1163.5471         | 1163.5235        | 20         | LKEHFPNKTIK            | [Hex]6[HexNAc]5[Fuc]1          |
|            | 3+           | 1231.2418         | 1231.2166        | 20         | LKEHFPNKTIK            | [Hex]6[HexNAc]6[Fuc]1          |
| C3-V4      | 2+           | 1235.0099         | 1234.9802        | 24         | GEFFYCNTSK             | [Hex]5[HexNAc]2                |
|            | 2+           | 1316.0454         | 1316.0066        | 29         | GEFFYCNTSK             | [Hex]6 [HexNAc]2               |
|            | 2+           | 1397.0778         | 1397.0330        | 32         | GEFFYCNTSK             | [Hex]7[HexNAc]2                |
|            | 2+           | 1478.1072         | 1478.0594        | 32         | GEFFYCNTSK             | [Hex]8[HexNAc]2                |
|            | 2+           | 1519.1221         | 1519.0860        | 24         | GEFFYCNTSK             | [Hex]6[HexNAc]4                |
|            | 2+           | 1559.1411         | 1559.0858        | 35         | GEFFYCNTSK             | [Hex]9[HexNAc]2                |
|            | 2+           | 1575.6453         | 1575.6098        |            | GEFFYCNTSK             | [Hex]4[HexNAc]4[Fuc]1[NeuNAc]1 |
| C4         | 2+           | 1200.0697         | 1200.0344        | 29         | AMYAPPIAGNITCK         | [Hex]3[HexNAc]2                |
|            | 2+           | 1301.6216         | 1301.5741        | 36         | AMYAPPIAGNITCK         | [Hex]3[HexNAc]3                |
|            | 2+           | 1476.1805         | 1476.1427        | 26         | AMYAPPIAGNITCK         | [Hex]3[HexNAc]4[Fuc]1          |
|            | 2+           | 1577.7615         | 1577.6824        | 50         | AMYAPPIAGNITCK         | [Hex]3[HexNAc]5[Fuc]1          |

| Env Domain | Charge State | Experimental Mass | Theoretical Mass | Mass Error | Peptide Sequence  | Glycan Composition              |
|------------|--------------|-------------------|------------------|------------|-------------------|---------------------------------|
|            | 2+           | 1679.3109         | 1679.2221        | 53         | AMYAPPIAGNITCK    | [Hex]3[HexNAc]6[Fuc]1           |
|            | 2+           | 1281.0992         | 1281.0608        | 30         | AMYAPPIAGNITCK    | [Hex]4[HexNAc]2                 |
|            | 2+           | 1382.6558         | 1382.6005        | 40         | AMYAPPIAGNITCK    | [Hex]4[HexNAc]3                 |
|            | 2+           | 1463.6767         | 1463.6269        | 34         | AMYAPPIAGNITCK    | [Hex]5 [HexNAc]3                |
|            | 2+           | 1362.1304         | 1362.0872        | 32         | AMYAPPIAGNITCK    | [Hex]5[HexNAc]2                 |
|            | 2+           | 1443.1597         | 1443.1136        | 32         | AMYAPPIAGNITCK    | [Hex]6 [HexNAc]2                |
|            | 2+           | 1524.1965         | 1524.1400        | 37         | AMYAPPIAGNITCK    | [Hex]7[HexNAc]2                 |
|            | 2+           | 1605.2305         | 1605.1664        | 40         | AMYAPPIAGNITCK    | [Hex]8[HexNAc]2                 |
|            | 2+           | 1686.2652         | 1686.1928        | 43         | AMYAPPIAGNITCK    | [Hex]9[HexNAc]2                 |
|            | 2+           | 990.5096          | 990.4857         | 24         | SNITGLLLTR        | [Hex]3[HexNAc]2                 |
|            | 2+           | 1092.0485         | 1092.0254        | 21         | SNITGLLLTR        | [Hex]3[HexNAc]3                 |
|            | 2+           | 1165.0845         | 1165.0544        | 26         | SNITGLLLTR        | [Hex]3[HexNAc]3[Fuc]1           |
|            | 2+           | 1237.5773         | 1237.5731        | 3          | SNITGLLLTR        | [Hex]3[HexNAc]3[NeuNAc]1        |
|            | 2+           | 1193.6089         | 1193.5651        | 37         | SNITGLLLTR        | [Hex]3[HexNAc]4                 |
|            | 2+           | 1266.6308         | 1266.5940        | 29         | SNITGLLLTR        | [Hex]3[HexNAc]4[Fuc]1           |
|            | 2+           | 1295.1545         | 1295.1048        | 38         | SNITGLLLTR        | [Hex]3[HexNAc]5                 |
|            | 2+           | 1368.1593         | 1368.1338        | 19         | SNITGLLLTR        | [Hex]3[HexNAc]5[Fuc]1           |
|            | 2+           | 1469.7062         | 1469.6735        | 22         | SNITGLLLTR        | [Hex]3[HexNAc]6[Fuc]1           |
|            | 2+           | 1274.6418         | 1274.5915        | 39         | SNITGLLLTR        | [Hex]4 [HexNAc]4                |
|            | 2+           | 1071.5379         | 1071.5122        | 24         | SNITGLLLTR        | [Hex]4[HexNAc]2                 |
|            | 2+           | 1173.0850         | 1173.0518        | 28         | SNITGLLLTR        | [Hex]4[HexNAc]3                 |
|            | 2+           | 1246.1144         | 1246.0808        | 27         | SNITGLLLTR        | [Hex]4[HexNAc]3[Fuc]1           |
|            | 2+           | 1449.1642         | 1449.1601        | 3          | SNITGLLLTR        | [Hex]4[HexNAc]5[Fuc]1           |
|            | 2+           | 1254.1127         | 1254.0782        | 28         | SNITGLLLTR        | [Hex]5 [HexNAc]3                |
|            | 2+           | 1152.5688         | 1152.5385        | 26         | SNITGLLLTR        | [Hex]5[HexNAc]2                 |
|            | 2+           | 1327.1442         | 1327.1072        | 28         | SNITGLLLTR        | [Hex]5[HexNAc]3[Fuc]1           |
|            | 2+           | 1428.6858         | 1428.6469        | 27         | SNITGLLLTR        | [Hex]5[HexNAc]4[Fuc]1           |
|            | 2+           | 1675.7205         | 1675.7343        | 8          | SNITGLLLTR        | [Hex]5[HexNAc]5[Fuc]1[NeuNAc]1  |
|            | 2+           | 1233.5995         | 1233.5650        | 28         | SNITGLLLTR        | [Hex]6 [HexNAc]2                |
|            | 2+           | 1335.1468         | 1335.1046        | 32         | SNITGLLLTR        | [Hex]6[HexNAc]3                 |
|            | 2+           | 1480.7057         | 1480.6523        | 36         | SNITGLLLTR        | [Hex]6[HexNAc]3[NeuNAc]1        |
|            | 2+           | 1314.6329         | 1314.5914        | 32         | SNITGLLLTR        | [Hex]7[HexNAc]2                 |
|            | 2+           | 1416.1557         | 1416.1310        | 17         | SNITGLLLTR        | [Hex]7[HexNAc]3                 |
|            | 2+           | 1395.6629         | 1395.6178        | 32         | SNITGLLLTR        | [Hex]8[HexNAc]2                 |
|            | 2+           | 1476.6938         | 1476.6442        | 34         | SNITGLLLTR        | [Hex]9[HexNAc]2                 |
| C4-V5      | 3+           | 1050.8028         | 1050.7769        | 25         | DGGKNNTEFRPGGGDMR | [Hex]3[HexNAc]3[Fuc]1           |
|            | 3+           | 1118.4990         | 1118.4700        | 26         | DGGKNNTEFRPGGGDMR | [Hex]3[HexNAc]4[Fuc]1           |
|            | 3+           | 1186.1962         | 1186.1632        | 28         | DGGKNNTEFRPGGGDMR | [Hex]3[HexNAc]5[Fuc]1           |
|            | 3+           | 1104.8234         | 1104.7945        | 26         | DGGKNNTEFRPGGGDMR | [Hex]4[HexNAc]3[Fuc]1           |
|            | 3+           | 1269.5431         | 1269.5195        | 19         | DGGKNNTEFRPGGGDMR | [Hex]4[HexNAc]4[Fuc]1 [NeuNAc]1 |
|            | 3+           | 1240.2155         | 1240.1808        | 28         | DGGKNNTEFRPGGGDMR | [Hex]4[HexNAc]5[Fuc]1           |
|            | 3+           | 1337.2565         | 1337.2126        | 33         | DGGKNNTEFRPGGGDMR | [Hex]4[HexNAc]5[Fuc]1 [NeuNAc]1 |
|            | 3+           | 1404.9519         | 1404.9057        | 33         | DGGKNNTEFRPGGGDMR | [Hex]4[HexNAc]6[Fuc]1 [NeuNAc]1 |
|            | 3+           | 1158.8431         | 1158.8121        | 27         | DGGKNNTEFRPGGGDMR | [Hex]5[HexNAc]3[Fuc]1           |
|            | 3+           | 1226.5415         | 1226.5053        | 30         | DGGKNNTEFRPGGGDMR | [Hex]5[HexNAc]4[Fuc]1           |
|            | 3+           | 1245.5370         | 1245.5124        | 20         | DGGKNNTEFRPGGGDMR | [Hex]5[HexNAc]5                 |
|            | 3+           | 1294.2400         | 1294.1984        | 32         | DGGKNNTEFRPGGGDMR | [Hex]5[HexNAc]5[Fuc]1           |
|            | 3+           | 1391.2897         | 1391.2302        | 43         | DGGKNNTEFRPGGGDMR | [Hex]5[HexNAc]5[Fuc]1 [NeuNAc]1 |
|            | 3+           | 1096.4819         | 1096.4507        | 28         | DGGKNNTEFRPGGGDMR | [Hex]6 [HexNAc]2                |
|            | 3+           | 1348.2501         | 1348.2160        | 25         | DGGKNNTEFRPGGGDMR | [Hex]6[HexNAc]5[Fuc]1           |
|            | 3+           | 1445.3079         | 1445.2478        | 42         | DGGKNNTEFRPGGGDMR | [Hex]6[HexNAc]5[Fuc]1 [NeuNAc]1 |
|            | 3+           | 1415.9688         | 1415.9091        | 42         | DGGKNNTEFRPGGGDMR | [Hex]6[HexNAc]6[Fuc]1           |
|            | 3+           | 1150.5018         | 1150.4683        | 29         | DGGKNNTEFRPGGGDMR | [Hex]7[HexNAc]2                 |

| Env Domain | Charge State | Experimental Mass | Theoretical Mass | Mass Error | Peptide Sequence         | Glycan Composition             |
|------------|--------------|-------------------|------------------|------------|--------------------------|--------------------------------|
|            | 3+           | 1258.5368         | 1258.5035        | 26         | DGGKNNTEFRPGGGDMR        | [Hex]9[HexNAc]2                |
| TM         | 2+           | 1480.1981         | 1480.1548        | 29         | LICTTAVPWNSSWSNK         | [Hex]3[HexNAc]3                |
|            | 2+           | 1553.2335         | 1553.1838        | 32         | LICTTAVPWNSSWSNK         | [Hex]3[HexNAc]3[Fuc]1          |
|            | 2+           | 1654.7867         | 1654.7234        | 38         | LICTTAVPWNSSWSNK         | [Hex]3[HexNAc]4[Fuc]1          |
|            | 2+           | 1756.3298         | 1756.2632        | 38         | LICTTAVPWNSSWSNK         | [Hex]3[HexNAc]5[Fuc]1          |
|            | 2+           | 1459.6937         | 1459.6416        | 36         | LICTTAVPWDSSWSNK         | [Hex]4[HexNAc]2                |
|            | 2+           | 1561.2463         | 1561.1812        | 42         | LICTTAVPWNSSWSNK         | [Hex]4[HexNAc]3                |
|            | 2+           | 1642.2718         | 1642.2076        | 39         | LICTTAVPWNSSWSNK         | [Hex]5 [HexNAc]3               |
|            | 2+           | 1540.7214         | 1540.6679        | 35         | LICTTAVPWNSSWSNK         | [Hex]5[HexNAc]2                |
|            | 2+           | 1962.3188         | 1962.324         | 3          | LICTTAVPWNSSWSNK         | [Hex]5[HexNAc]4[Fuc]1[NeuNAc]1 |
|            | 2+           | 1621.7556         | 1621.6944        | 38         | LICTTAVPWNSSWSNK         | [Hex]6 [HexNAc]2               |
|            | 2+           | 1723.2905         | 1723.234         | 33         | LICTTAVPWNSSWSNK         | [Hex]6[HexNAc]3                |
|            | 2+           | 1702.7874         | 1702.7208        | 39         | LICTTAVPWNSSWSNK         | [Hex]7[HexNAc]2                |
|            | 2+           | 1783.8153         | 1783.7472        | 38         | LICTTAVPWNSSWSNK         | [Hex]8[HexNAc]2                |
|            | 2+           | 1308.5971         | 1308.5577        | 30         | EISNYTDIYR               | [Hex]3[HexNAc]3[Fuc]1          |
|            | 2+           | 1410.1390         | 1410.0973        | 30         | EISNYTDIYR               | [Hex]3[HexNAc]4[Fuc]1          |
|            | 2+           | 1511.6934         | 1511.6371        | 37         | EISNYTDIYR               | [Hex]3[HexNAc]5[Fuc]1          |
|            | 2+           | 1613.2339         | 1613.1768        | 35         | EISNYTDIYR               | [Hex]3[HexNAc]6[Fuc]1          |
|            | 2+           | 1389.6246         | 1389.5841        | 29         | EISNYTDIYR               | [Hex]4[HexNAc]3[Fuc]1          |
|            | 2+           | 1296.0817         | 1296.0418        | 31         | EISNYTDIYR               | [Hex]5[HexNAc]2                |
|            | 2+           | 1470.6725         | 1470.6105        | 42         | EISNYTDIYR               | [Hex]5[HexNAc]3[Fuc]1          |
| 2+         | 1377.1093    | 1377.0683         | 30               | EISNYTDIYR | [Hex]6 [HexNAc]2         |                                |
| 2+         | 1624.2318    | 1624.1556         | 47               | EISNYTDIYR | [Hex]6[HexNAc]3[NeuNAc]1 |                                |
| 2+         | 1458.1374    | 1458.0947         | 29               | EISNYTDIYR | [Hex]7[HexNAc]2          |                                |
| 2+         | 1742.2623    | 1742.2004         | 36               | EISNYTDIYR | [Hex]8[HexNAc]4          |                                |
| 2+         | 1620.2043    | 1620.1475         | 35               | EISNYTDIYR | [Hex]9[HexNAc]2          |                                |
|            | 2+           | 1070.9678         | 1070.9462        | 20         | SQEDIWDNMTWMQWDR         | non-glycosylated               |

Supplementary Table 2B. MALDI-MS Glycopeptide Compositions for C.CON gp140 ΔCF

| Env Domain | Charge State | Experimental Mass | Theoretical Mass | Mass Error               | Peptide Sequence         | *Mod                    | Glycan Composition      |
|------------|--------------|-------------------|------------------|--------------------------|--------------------------|-------------------------|-------------------------|
| C1-V1      | 1+           | 5286.3784         | 5285.4991        | 166                      | LTPLCVTLNCTNATNATNTMGEIK |                         | [Hex]7 [HexNAc]6 [Fuc]2 |
|            | 1+           | 5489.3618         | 5488.6941        | 122                      | LTPLCVTLNCTNATNATNTMGEIK |                         | [Hex]7 [HexNAc]7 [Fuc]2 |
|            | 1+           | 5601.7202         | 5602.7981        | 192                      | LTPLCVTLNCTNATNATNTMGEIK |                         | [Hex]7 [HexNAc]9        |
|            | 1+           | 5806.0859         | 5805.9931        | 16                       | LTPLCVTLNCTNATNATNTMGEIK |                         | [Hex]7 [HexNAc]10       |
|            | 1+           | 5155.1592         | 5155.3555        | 38                       | LTPLCVTLNCTNATNATNTMGEIK |                         | [Hex]8 [HexNAc]6        |
|            | 1+           | 5360.3022         | 5358.5505        | 327                      | LTPLCVTLNCTNATNATNTMGEIK |                         | [Hex]8 [HexNAc]7        |
|            | 1+           | 5764.6094         | 5764.9405        | 57                       | LTPLCVTLNCTNATNATNTMGEIK |                         | [Hex]8 [HexNAc]9        |
|            | 1+           | 5967.8945         | 5968.1354        | 40                       | LTPLCVTLNCTNATNATNTMGEIK |                         | [Hex]8 [HexNAc]10       |
|            | 1+           | 6171.1860         | 6171.3305        | 23                       | LTPLCVTLNCTNATNATNTMGEIK |                         | [Hex]8 [HexNAc]11       |
|            | 1+           | 6374.4961         | 6374.5255        | 5                        | LTPLCVTLNCTNATNATNTMGEIK |                         | [Hex]8 [HexNAc]12       |
|            | 1+           | 6577.3652         | 6577.7205        | 54                       | LTPLCVTLNCTNATNATNTMGEIK |                         | [Hex]8 [HexNAc]13       |
|            | 1+           | 5113.6440         | 5114.3024        | 129                      | LTPLCVTLNCTNATNATNTMGEIK |                         | [Hex]9 [HexNAc]5        |
|            | 1+           | 5522.8213         | 5520.6929        | 386                      | LTPLCVTLNCTNATNATNTMGEIK |                         | [Hex]9 [HexNAc]7        |
|            | 1+           | 5724.1836         | 5723.8879        | 52                       | LTPLCVTLNCTNATNATNTMGEIK |                         | [Hex]9 [HexNAc]8        |
|            | 1+           | 5928.4111         | 5927.0829        | 224                      | LTPLCVTLNCTNATNATNTMGEIK |                         | [Hex]9 [HexNAc]9        |
|            | 1+           | 5072.6533         | 5073.2503        | 118                      | LTPLCVTLNCTNATNATNTMGEIK |                         | [Hex]10 [HexNAc]4       |
|            | 1+           | 5685.5425         | 5682.8353        | 476                      | LTPLCVTLNCTNATNATNTMGEIK |                         | [Hex]10 [HexNAc]7       |
|            | 1+           | 5234.4233         | 5235.3927        | 185                      | LTPLCVTLNCTNATNATNTMGEIK |                         | [Hex]11 [HexNAc]4       |
| 1+         | 5396.5200    | 5397.5351         | 188              | LTPLCVTLNCTNATNATNTMGEIK |                          | [Hex]12 [HexNAc]4       |                         |
| 1+         | 6006.2280    | 6007.1201         | 149              | LTPLCVTLNCTNATNATNTMGEIK |                          | [Hex]12 [HexNAc]7       |                         |
| V1/V2      | 1+           | 2799.6101         | 2799.1758        | 155                      | NCSFNITTELR              |                         | [Hex]3[HexNAc]4[Fuc]1   |
|            | 1+           | 3002.6665         | 3002.2553        | 137                      | NCSFNITTELR              |                         | [Hex]3[HexNAc]5[Fuc]1   |
|            | 1+           | 3205.7878         | 3205.3347        | 141                      | NCSFNITTELR              |                         | [Hex]3[HexNAc]6[Fuc]1   |
|            | 1+           | 2758.5537         | 2758.1493        | 147                      | NCSFNITTELR              |                         | [Hex]4[HexNAc]3[Fuc]1   |
|            | 1+           | 3164.7595         | 3164.3080        | 143                      | NCSFNITTELR              |                         | [Hex]4[HexNAc]5[Fuc]1   |
|            | 1+           | 2571.4458         | 2571.0648        | 148                      | NCSFNITTELR              |                         | [Hex]5[HexNAc]2         |
|            | 1+           | 2919.9165         | 2920.2021        | 98                       | NCSFNITTELR              |                         | [Hex]5[HexNAc]3[Fuc]1   |
|            | 1+           | 3123.7192         | 3123.2815        | 140                      | NCSFNITTELR              |                         | [Hex]5[HexNAc]4[Fuc]1   |
|            | 1+           | 3326.8188         | 3326.3609        | 138                      | NCSFNITTELR              |                         | [Hex]5[HexNAc]5[Fuc]1   |
|            | 1+           | 2733.3591         | 2733.1177        | 88                       | NCSFNITTELR              |                         | [Hex]6 [HexNAc]2        |
|            | 1+           | 3082.7095         | 3082.2549        | 147                      | NCSFNITTELR              |                         | [Hex]6[HexNAc]3[Fuc]1   |
|            | 1+           | 3691.9773         | 3691.4931        | 131                      | NCSFNITTELR              |                         | [Hex]6[HexNAc]6[Fuc]1   |
|            | 1+           | 4503.6958         | 4503.8105        | 25                       | NCSFNITTELR              |                         | [Hex]6[HexNAc]10[Fuc]1  |
|            | 1+           | 2895.5461         | 2895.1705        | 130                      | NCSFNITTELR              |                         | [Hex]7[HexNAc]2         |
|            | 1+           | 4665.7813         | 4665.8633        | 18                       | NCSFNITTELR              |                         | [Hex]7[HexNAc]10[Fuc]1  |
|            | 1+           | 3057.6719         | 3057.2233        | 147                      | NCSFNITTELR              |                         | [Hex]8[HexNAc]2         |
|            | 1+           | 4827.8433         | 4827.9161        | 15                       | NCSFNITTELR              |                         | [Hex]8[HexNAc]10[Fuc]1  |
|            | 1+           | 3219.7573         | 3219.2761        | 149                      | NCSFNITTELR              |                         | [Hex]9[HexNAc]2         |
| 1+         | 4989.9180    | 4989.9690         | 10               | NCSFNITTELR              |                          | [Hex]9[HexNAc]10[Fuc]1  |                         |
| 1+         | 5152.0703    | 5152.0218         | 9                | NCSFNITTELR              |                          | [Hex]10[HexNAc]10[Fuc]1 |                         |
| 1+         | 5314.2603    | 5314.0746         | 35               | NCSFNITTELR              |                          | [Hex]11[HexNAc]10[Fuc]1 |                         |
| 1+         | 5476.0086    | 5476.1274         | 22               | NCSFNITTELR              |                          | [Hex]12[HexNAc]10[Fuc]1 |                         |
| V2         | 1+           | 2438.6860         | 2439.1032        | 171                      | LDIVPLNENNSYR            |                         | [Hex]3[HexNAc]2         |
|            | 1+           | 2641.8313         | 2642.1826        | 133                      | LDIVPLNENNSYR            |                         | [Hex]3[HexNAc]3         |
|            | 1+           | 2788.6597         | 2788.2404        | 150                      | LDIVPLNENNSYR            |                         | [Hex]3[HexNAc]3[Fuc]1   |
|            | 1+           | 2845.8538         | 2845.2619        | 208                      | LDIVPLNENNSYR            |                         | [Hex]3[HexNAc]4         |
|            | 1+           | 2991.7131         | 2991.3197        | 132                      | LDIVPLNENNSYR            |                         | [Hex]3[HexNAc]4[Fuc]1   |
|            | 1+           | 3048.9717         | 3048.3414        | 207                      | LDIVPLNENNSYR            |                         | [Hex]3[HexNAc]5         |
|            | 1+           | 3194.8367         | 3194.3992        | 137                      | LDIVPLNENNSYR            |                         | [Hex]3[HexNAc]5[Fuc]1   |
|            | 1+           | 3250.8193         | 3251.4207        | 185                      | LDIVPLNENNSYR            |                         | [Hex]3[HexNAc]6         |

| Env Domain | Charge State | Experimental Mass | Theoretical Mass | Mass Error | Peptide Sequence | *Mod | Glycan Composition    |
|------------|--------------|-------------------|------------------|------------|------------------|------|-----------------------|
|            | 1+           | 3397.1240         | 3397.4787        | 104        | LDIVPLNENNSYR    |      | [Hex]3[HexNAc]6[Fuc]1 |
|            | 1+           | 3007.9524         | 3007.3148        | 212        | LDIVPLNENNSYR    |      | [Hex]4 [HexNAc]4      |
|            | 1+           | 2600.8037         | 2601.1561        | 135        | LDIVPLNENNSYR    |      | [Hex]4[HexNAc]2       |
|            | 1+           | 2804.8242         | 2804.2354        | 210        | LDIVPLNENNSYR    |      | [Hex]4[HexNAc]3       |
|            | 1+           | 2950.6931         | 2950.2932        | 136        | LDIVPLNENNSYR    |      | [Hex]4[HexNAc]3[Fuc]1 |
|            | 1+           | 3356.8442         | 3356.4519        | 117        | LDIVPLNENNSYR    |      | [Hex]4[HexNAc]5[Fuc]1 |
|            | 1+           | 2966.6328         | 2966.2881        | 116        | LDIVPLNENNSYR    |      | [Hex]5 [HexNAc]3      |
|            | 1+           | 2763.6226         | 2763.2087        | 150        | LDIVPLNENNSYR    |      | [Hex]5[HexNAc]2       |
|            | 1+           | 3112.7966         | 3112.3460        | 145        | LDIVPLNENNSYR    |      | [Hex]5[HexNAc]3[Fuc]1 |
|            | 1+           | 3315.9260         | 3315.4254        | 151        | LDIVPLNENNSYR    |      | [Hex]5[HexNAc]4[Fuc]1 |
|            | 1+           | 3519.0183         | 3518.5048        | 146        | LDIVPLNENNSYR    |      | [Hex]5[HexNAc]5[Fuc]1 |
|            | 1+           | 2924.8999         | 2925.2617        | 124        | LDIVPLNENNSYR    |      | [Hex]6 [HexNAc]2      |
|            | 1+           | 3535.3845         | 3534.4998        | 250        | LDIVPLNENNSYR    |      | [Hex]6 [HexNAc]5      |
|            | 1+           | 3129.0271         | 3128.3410        | 219        | LDIVPLNENNSYR    |      | [Hex]6[HexNAc]3       |
|            | 1+           | 3738.3733         | 3737.5792        | 212        | LDIVPLNENNSYR    |      | [Hex]6[HexNAc]6       |
|            | 1+           | 3883.0996         | 3883.6370        | 138        | LDIVPLNENNSYR    |      | [Hex]6[HexNAc]6[Fuc]1 |
|            | 1+           | 3087.0163         | 3087.3145        | 97         | LDIVPLNENNSYR    |      | [Hex]7[HexNAc]2       |
|            | 1+           | 3494.1809         | 3493.4732        | 203        | LDIVPLNENNSYR    |      | [Hex]7[HexNAc]4       |
|            | 1+           | 4046.2751         | 4045.6898        | 145        | LDIVPLNENNSYR    |      | [Hex]7[HexNAc]6[Fuc]1 |
|            | 1+           | 4249.3848         | 4248.7692        | 145        | LDIVPLNENNSYR    |      | [Hex]7[HexNAc]7[Fuc]1 |
|            | 1+           | 3249.8628         | 3249.3672        | 153        | LDIVPLNENNSYR    |      | [Hex]8[HexNAc]2       |
|            | 1+           | 3411.9031         | 3411.4200        | 142        | LDIVPLNENNSYR    |      | [Hex]9[HexNAc]2       |
| V2-C2      | 1+           | 3135.7009         | 3135.3588        | 109        | LINCNTSAITQACPK  |      | [Hex]3[HexNAc]4[Fuc]1 |
|            | 1+           | 3338.8423         | 3338.4383        | 121        | LINCNTSAITQACPK  |      | [Hex]3[HexNAc]5[Fuc]1 |
|            | 1+           | 3395.8850         | 3395.4598        | 125        | LINCNTSAITQACPK  |      | [Hex]3[HexNAc]6       |
|            | 1+           | 3541.7887         | 3541.5177        | 77         | LINCNTSAITQACPK  |      | [Hex]3[HexNAc]6[Fuc]1 |
|            | 1+           | 3094.7599         | 3094.3323        | 138        | LINCNTSAITQACPK  |      | [Hex]4[HexNAc]3[Fuc]1 |
|            | 1+           | 3500.9180         | 3500.4910        | 122        | LINCNTSAITQACPK  |      | [Hex]4[HexNAc]5[Fuc]1 |
|            | 1+           | 3110.6927         | 3110.3272        | 118        | LINCNTSAITQACPK  |      | [Hex]5 [HexNAc]3      |
|            | 1+           | 2907.5618         | 2907.2478        | 108        | LINCNTSAITQACPK  |      | [Hex]5[HexNAc]2       |
|            | 1+           | 3256.9709         | 3256.3851        | 180        | LINCNTSAITQACPK  |      | [Hex]5[HexNAc]3[Fuc]1 |
|            | 1+           | 3460.0225         | 3459.4645        | 161        | LINCNTSAITQACPK  |      | [Hex]5[HexNAc]4[Fuc]1 |
|            | 1+           | 3069.1637         | 3069.3007        | 45         | LINCNTSAITQACPK  |      | [Hex]6 [HexNAc]2      |
|            | 1+           | 3231.7561         | 3231.3535        | 125        | LINCNTSAITQACPK  |      | [Hex]7[HexNAc]2       |
|            | 1+           | 3393.7733         | 3393.4063        | 108        | LINCNTSAITQACPK  |      | [Hex]8[HexNAc]2       |
|            | 1+           | 3555.8867         | 3555.4592        | 120        | LINCNTSAITQACPK  |      | [Hex]9[HexNAc]2       |
| V3-C3      | 1+           | 4550.1353         | 4548.7479        | 305        | QAHCNISEDKWNK    |      | [Hex]13[HexNAc]4      |
|            | 1+           | 4711.2480         | 4710.7007        | 116        | QAHCNISEDKWNK    |      | [Hex]14[HexNAc]4      |
|            | 1+           | 4874.2515         | 4872.8536        | 287        | QAHCNISEDKWNK    |      | [Hex]15[HexNAc]4      |
|            | 1+           | 5035.0863         | 5034.9064        | 36         | QAHCNISEDKWNK    |      | [Hex]16[HexNAc]4      |
|            | 1+           | 5197.1663         | 5196.9592        | 40         | QAHCNISEDKWNK    |      | [Hex]17[HexNAc]4      |
|            | 1+           | 5359.7002         | 5359.012         | 128        | QAHCNISEDKWNK    |      | [Hex]18[HexNAc]4      |
| C3         | 1+           | 2355.1382         | 2355.0596        | 33         | EHPNKTIK         |      | [Hex]3[HexNAc]3[Fuc]1 |
|            | 1+           | 2558.2378         | 2558.1389        | 39         | EHPNKTIK         |      | [Hex]3[HexNAc]4[Fuc]1 |
|            | 1+           | 2761.3391         | 2761.2184        | 44         | EHPNKTIK         |      | [Hex]3[HexNAc]5[Fuc]1 |
|            | 1+           | 2964.5193         | 2964.2978        | 75         | EHPNKTIK         |      | [Hex]3[HexNAc]6[Fuc]1 |
|            | 1+           | 2923.3567         | 2923.2711        | 29         | EHPNKTIK         |      | [Hex]4[HexNAc]5[Fuc]1 |
|            | 1+           | 2229.1558         | 2228.9803        | 79         | LKEHFPNK         |      | [Hex]5[HexNAc]2       |
|            | 1+           | 2660.2358         | 2660.1708        | 24         | LKEHFPNK         |      | [Hex]3[HexNAc]5[Fuc]1 |
|            | 1+           | 2822.0769         | 2822.2235        | 52         | LKEHFPNK         |      | [Hex]4[HexNAc]5[Fuc]1 |
|            | 1+           | 2863.3303         | 2863.2502        | 28         | LKEHFPNK         |      | [Hex]3[HexNAc]6[Fuc]1 |

| Env Domain | Charge State | Experimental Mass | Theoretical Mass | Mass Error | Peptide Sequence   | *Mod | Glycan Composition        |
|------------|--------------|-------------------|------------------|------------|--------------------|------|---------------------------|
|            | 1+           | 2457.1396         | 2457.0913        | 20         | LKEHFPNK           |      | [Hex]3[HexNAc]4[Fuc]1     |
|            | 1+           | 2714.8149         | 2715.1388        | 119        | LKEHFPNK           |      | [Hex]8[HexNAc]2           |
|            | 1+           | 2596.4309         | 2596.2388        | 74         | LKEHFPNKTIK        |      | [Hex]3[HexNAc]3[Fuc]1     |
|            | 1+           | 2799.3229         | 2799.3180        | 2          | LKEHFPNKTIK        |      | [Hex]3[HexNAc]4[Fuc]1     |
|            | 1+           | 3002.6062         | 3002.3975        | 70         | LKEHFPNKTIK        |      | [Hex]3[HexNAc]5[Fuc]1     |
|            | 1+           | 3205.4588         | 3205.4769        | 6          | LKEHFPNKTIK        |      | [Hex]3[HexNAc]6[Fuc]1     |
|            | 1+           | 3164.6772         | 3164.4503        | 72         | LKEHFPNKTIK        |      | [Hex]4[HexNAc]5[Fuc]1     |
|            | 1+           | 2571.4624         | 2571.2071        | 99         | LKEHFPNKTIK        |      | [Hex]5[HexNAc]2           |
|            | 1+           | 3082.3440         | 3082.3971        | 17         | LKEHFPNKTIK        |      | [Hex]6[HexNAc]3[Fuc]1     |
|            | 1+           | 3057.6233         | 3057.3656        | 84         | LKEHFPNKTIK        |      | [Hex]8[HexNAc]2           |
| C3-V4      | 1+           | 2350.1602         | 2349.9062        | 108        | GEFFYCNTSK         | u    | [Hex]4[HexNAc]2           |
|            | 1+           | 2469.2314         | 2468.9531        | 113        | GEFFYCNTSK         |      | [Hex]5[HexNAc]2           |
|            | 1+           | 2631.2871         | 2631.0060        | 107        | GEFFYCNTSK         |      | [Hex]6 [HexNAc]2          |
|            | 1+           | 2793.4138         | 2793.0588        | 127        | GEFFYCNTSK         |      | [Hex]7[HexNAc]2           |
|            | 1+           | 2955.5032         | 2955.1116        | 133        | GEFFYCNTSK         |      | [Hex]8[HexNAc]2           |
|            | 1+           | 3360.9097         | 3361.2703        | 107        | GEFFYCNTSK         |      | [Hex]8[HexNAc]4           |
|            | 1+           | 3117.2520         | 3117.1644        | 28         | GEFFYCNTSK         |      | [Hex]9[HexNAc]2           |
| V4         | 1+           | 5033.8232         | 5035.0910        | 252        | LFNSTYNSTNSTITLPCR |      | [Hex]6 [HexNAc]9 [Fuc]1   |
|            | 1+           | 5237.9712         | 5238.1704        | 38         | LFNSTYNSTNSTITLPCR |      | [Hex]6 [HexNAc]10 [Fuc]1  |
|            | 1+           | 5441.1465         | 5441.2498        | 19         | LFNSTYNSTNSTITLPCR |      | [Hex]6 [HexNAc]11 [Fuc]1  |
|            | 1+           | 5196.9292         | 5197.1439        | 41         | LFNSTYNSTNSTITLPCR |      | [Hex]7 [HexNAc]9 [Fuc]1   |
|            | 1+           | 5400.0229         | 5400.2232        | 37         | LFNSTYNSTNSTITLPCR |      | [Hex]7 [HexNAc]10 [Fuc]1  |
|            | 1+           | 5603.1012         | 5603.3026        | 36         | LFNSTYNSTNSTITLPCR |      | [Hex]7 [HexNAc]11 [Fuc]1  |
|            | 1+           | 4750.3035         | 4749.9586        | 73         | LFNSTYNSTNSTITLPCR |      | [Hex]8 [HexNAc]6[Fuc]1    |
|            | 1+           | 4953.6380         | 4953.0379        | 121        | LFNSTYNSTNSTITLPCR |      | [Hex]8 [HexNAc]7 [Fuc]1   |
|            | 1+           | 5009.9341         | 5010.0594        | 25         | LFNSTYNSTNSTITLPCR |      | [Hex]8 [HexNAc]8          |
|            | 1+           | 5359.0361         | 5359.1967        | 30         | LFNSTYNSTNSTITLPCR |      | [Hex]8 [HexNAc]9 [Fuc]1   |
|            | 1+           | 5562.1945         | 5562.2760        | 15         | LFNSTYNSTNSTITLPCR |      | [Hex]8 [HexNAc]10 [Fuc]1  |
|            | 1+           | 4912.4868         | 4912.0114        | 97         | LFNSTYNSTNSTITLPCR |      | [Hex]9 [HexNAc]6 [Fuc]1   |
|            | 1+           | 5115.5584         | 5115.0908        | 91         | LFNSTYNSTNSTITLPCR |      | [Hex]9 [HexNAc]7 [Fuc]1   |
|            | 1+           | 5463.9229         | 5464.2280        | 56         | LFNSTYNSTNSTITLPCR |      | [Hex]9 [HexNAc]8 [Fuc]2   |
|            | 1+           | 5520.9499         | 5521.2495        | 54         | LFNSTYNSTNSTITLPCR |      | [Hex]9 [HexNAc]9 [Fuc]1   |
|            | 1+           | 5983.6040         | 5984.4297        | 138        | LFNSTYNSTNSTITLPCR |      | [Hex]9 [HexNAc]12         |
|            | 1+           | 4871.5065         | 4870.9848        | 107        | LFNSTYNSTNSTITLPCR |      | [Hex]10 [HexNAc]5 [Fuc]1  |
|            | 1+           | 5074.5331         | 5074.0642        | 92         | LFNSTYNSTNSTITLPCR |      | [Hex]10 [HexNAc]6 [Fuc]1  |
|            | 1+           | 5276.7524         | 5277.1436        | 74         | LFNSTYNSTNSTITLPCR |      | [Hex]10 [HexNAc]7 [Fuc]1  |
|            | 1+           | 5626.3662         | 5626.2809        | 15         | LFNSTYNSTNSTITLPCR |      | [Hex]10 [HexNAc]8 [Fuc]2  |
|            | 1+           | 5832.8578         | 5832.7859        | 12         | LFNSTYNSTNSTITLPCR |      | [Hex]10 [HexNAc]9 [Fuc]2  |
|            | 1+           | 6146.3813         | 6146.4825        | 16         | LFNSTYNSTNSTITLPCR |      | [Hex]10 [HexNAc]12        |
|            | 1+           | 5788.2444         | 5788.3337        | 15         | LFNSTYNSTNSTITLPCR |      | [Hex]11 [HexNAc]8 [Fuc]2  |
|            | 1+           | 5996.0981         | 5994.9283        | 195        | LFNSTYNSTNSTITLPCR |      | [Hex]11 [HexNAc]9 [Fuc]2  |
|            | 1+           | 5658.2041         | 5658.2707        | 12         | LFNSTYNSTNSTITLPCR |      | [Hex]12 [HexNAc]8         |
|            | 1+           | 6155.1016         | 6157.0707        | 320        | LFNSTYNSTNSTITLPCR |      | [Hex]12 [HexNAc]9 [Fuc]2  |
|            | 1+           | 5820.0244         | 5820.3235        | 51         | LFNSTYNSTNSTITLPCR |      | [Hex]13 [HexNAc]8         |
|            | 1+           | 6319.3213         | 6319.2131        | 17         | LFNSTYNSTNSTITLPCR |      | [Hex]13 [HexNAc]9 [Fuc]2  |
|            | 1+           | 6226.5195         | 6226.4822        | 6          | LFNSTYNSTNSTITLPCR |      | [Hex]13 [HexNAc]10        |
|            | 1+           | 6429.5044         | 6429.5616        | 9          | LFNSTYNSTNSTITLPCR |      | [Hex]13 [HexNAc]11        |
|            | 1+           | 6928.7981         | 6926.8408        | 283        | LFNSTYNSTNSTITLPCR |      | [Hex]13 [HexNAc]12 [Fuc]2 |
|            | 1+           | 6387.9977         | 6388.5351        | 84         | LFNSTYNSTNSTITLPCR |      | [Hex]14 [HexNAc]10        |
|            | 1+           | 6886.6855         | 6887.7455        | 154        | LFNSTYNSTNSTITLPCR |      | [Hex]14 [HexNAc]11 [Fuc]2 |
|            | 1+           | 7090.7192         | 7090.9405        | 31         | LFNSTYNSTNSTITLPCR |      | [Hex]14 [HexNAc]12 [Fuc]2 |
|            | 1+           | 7294.2871         | 7294.1355        | 21         | LFNSTYNSTNSTITLPCR |      | [Hex]14 [HexNAc]13 [Fuc]2 |



| Env Domain | Charge State | Experimental Mass | Theoretical Mass | Mass Error | Peptide Sequence   | *Mod | Glycan Composition        |
|------------|--------------|-------------------|------------------|------------|--------------------|------|---------------------------|
|            | 1+           | 7253.5742         | 7253.0829        | 68         | LFNSTYNSTNSTITLPCR |      | [Hex]15 [HexNAc]12 [Fuc]2 |
|            | 1+           | 6598.2700         | 6598.5978        | 50         | LFNSTYNSTNSTITLPCR |      | [Hex]16 [HexNAc]8 [Fuc]2  |
| C4         | 1+           | 2723.3911         | 2723.1671        | 82         | AMYAPPIAGNITCK     |      | [Hex]5[HexNAc]2           |
|            | 1+           | 2885.4890         | 2885.2200        | 93         | AMYAPPIAGNITCK     |      | [Hex]6 [HexNAc]2          |
|            | 1+           | 3047.5786         | 3047.2728        | 100        | AMYAPPIAGNITCK     |      | [Hex]7[HexNAc]2           |
|            | 1+           | 3209.6536         | 3209.3256        | 102        | AMYAPPIAGNITCK     |      | [Hex]8[HexNAc]2           |
|            | 1+           | 3371.7434         | 3371.3784        | 108        | AMYAPPIAGNITCK     |      | [Hex]9[HexNAc]2           |
|            | 1+           | 2154.2725         | 2154.0172        | 119        | SNITGLLLTR         | for  | [Hex]3[HexNAc]2[Fuc]1     |
|            | 1+           | 2329.6628         | 2329.1015        | 241        | SNITGLLLTR         |      | [Hex]3[HexNAc]3[Fuc]1     |
|            | 1+           | 2532.6377         | 2532.1808        | 180        | SNITGLLLTR         |      | [Hex]3[HexNAc]4[Fuc]1     |
|            | 1+           | 2735.8140         | 2735.2603        | 202        | SNITGLLLTR         |      | [Hex]3[HexNAc]5[Fuc]1     |
|            | 1+           | 2937.8950         | 2938.3397        | 151        | SNITGLLLTR         |      | [Hex]3[HexNAc]6[Fuc]1     |
|            | 1+           | 2142.4172         | 2142.0171        | 187        | SNITGLLLTR         |      | [Hex]4[HexNAc]2           |
|            | 1+           | 2490.5527         | 2491.1543        | 241        | SNITGLLLTR         |      | [Hex]4[HexNAc]3[Fuc]1     |
|            | 1+           | 2507.5208         | 2507.1494        | 148        | SNITGLLLTR         |      | [Hex]5 [HexNAc]3          |
|            | 1+           | 2304.3997         | 2304.0698        | 143        | SNITGLLLTR         |      | [Hex]5[HexNAc]2           |
|            | 1+           | 2466.4861         | 2466.1229        | 147        | SNITGLLLTR         |      | [Hex]6 [HexNAc]2          |
|            | 1+           | 3221.7856         | 3221.4187        | 114        | SNITGLLLTR         |      | [Hex]6[HexNAc]5[Fuc]1     |
|            | 1+           | 2628.5491         | 2628.1757        | 142        | SNITGLLLTR         |      | [Hex]7[HexNAc]2           |
|            | 1+           | 2790.6248         | 2790.2285        | 142        | SNITGLLLTR         |      | [Hex]8[HexNAc]2           |
|            | 1+           | 2952.7112         | 2952.2813        | 146        | SNITGLLLTR         |      | [Hex]9[HexNAc]2           |
|            | 1+           | 3589.9162         | 3589.5143        | 112        | SNITGLLLTR         | for  | [Hex]9[HexNAc]5           |
| C4-V5      | 1+           | 3539.4487         | 3539.4107        | 11         | NNTETFRPGGGDMR     |      | [Hex]6 [HexNAc]5          |
|            | 1+           | 2793.4939         | 2793.1514        | 123        | NNTETFRPGGGDMR     |      | [Hex]3[HexNAc]3[Fuc]1     |
|            | 1+           | 3199.6873         | 3199.3102        | 118        | NNTETFRPGGGDMR     |      | [Hex]3[HexNAc]5[Fuc]1     |
|            | 1+           | 2996.6045         | 2996.2307        | 125        | NNTETFRPGGGDMR     |      | [Hex]3[HexNAc]4[Fuc]1     |
|            | 1+           | 2947.5244         | 2947.2369        | 98         | DGGKNNETFRPGGGDMR  |      | [Hex]3[HexNAc]2[Fuc]1     |
|            | 1+           | 3004.5134         | 3004.2584        | 85         | DGGKNNETFRPGGGDMR  |      | [Hex]3[HexNAc]3           |
|            | 1+           | 3150.3438         | 3150.3163        | 9          | DGGKNNETFRPGGGDMR  |      | [Hex]3[HexNAc]3[Fuc]1     |
|            | 1+           | 3209.2017         | 3209.2419        | 13         | DGGKNNETFRPGGGDMR  |      | [Hex]3[HexNAc]4           |
|            | 1+           | 3353.6272         | 3353.3956        | 69         | DGGKNNETFRPGGGDMR  |      | [Hex]3[HexNAc]4[Fuc]1     |
|            | 1+           | 3412.5823         | 3412.4369        | 43         | DGGKNNETFRPGGGDMR  |      | [Hex]3[HexNAc]5           |
|            | 1+           | 3556.7319         | 3556.4751        | 72         | DGGKNNETFRPGGGDMR  |      | [Hex]3[HexNAc]5[Fuc]1     |
|            | 1+           | 3615.5510         | 3615.6319        | 22         | DGGKNNETFRPGGGDMR  |      | [Hex]3[HexNAc]6           |
|            | 1+           | 3761.3745         | 3761.7749        | 106        | DGGKNNETFRPGGGDMR  |      | [Hex]3[HexNAc]6 [Fuc]1    |
|            | 1+           | 3759.8401         | 3759.5545        | 76         | DGGKNNETFRPGGGDMR  |      | [Hex]3[HexNAc]6[Fuc]1     |
|            | 1+           | 3962.9216         | 3962.6336        | 73         | DGGKNNETFRPGGGDMR  |      | [Hex]3[HexNAc]7[Fuc]1     |
|            | 1+           | 3369.7190         | 3369.3905        | 97         | DGGKNNETFRPGGGDMR  |      | [Hex]4 [HexNAc]4          |
|            | 1+           | 3312.6216         | 3312.3691        | 76         | DGGKNNETFRPGGGDMR  |      | [Hex]4[HexNAc]3[Fuc]1     |
|            | 1+           | 3370.6760         | 3371.3843        | 210        | DGGKNNETFRPGGGDMR  |      | [Hex]4[HexNAc]4           |
|            | 1+           | 3516.7559         | 3517.5273        | 219        | DGGKNNETFRPGGGDMR  |      | [Hex]4[HexNAc]4 [Fuc]1    |
|            | 1+           | 3572.7192         | 3572.4700        | 70         | DGGKNNETFRPGGGDMR  |      | [Hex]4[HexNAc]5           |
|            | 1+           | 3718.8135         | 3718.5278        | 77         | DGGKNNETFRPGGGDMR  |      | [Hex]4[HexNAc]5[Fuc]1     |
|            | 1+           | 3777.6079         | 3777.7743        | 44         | DGGKNNETFRPGGGDMR  |      | [Hex]4[HexNAc]6           |
|            | 1+           | 3921.8999         | 3921.6071        | 75         | DGGKNNETFRPGGGDMR  |      | [Hex]4[HexNAc]6[Fuc]1     |
|            | 1+           | 4125.1121         | 4124.6864        | 103        | DGGKNNETFRPGGGDMR  |      | [Hex]4[HexNAc]7[Fuc]1     |
|            | 1+           | 3328.5667         | 3328.3640        | 61         | DGGKNNETFRPGGGDMR  |      | [Hex]5 [HexNAc]3          |
|            | 1+           | 3125.5046         | 3125.2846        | 70         | DGGKNNETFRPGGGDMR  |      | [Hex]5[HexNAc]2           |
|            | 1+           | 3474.6758         | 3474.4219        | 73         | DGGKNNETFRPGGGDMR  |      | [Hex]5[HexNAc]3[Fuc]1     |
|            | 1+           | 3677.7734         | 3677.5013        | 74         | DGGKNNETFRPGGGDMR  |      | [Hex]5[HexNAc]4[Fuc]1     |
|            | 1+           | 3880.8906         | 3880.5807        | 80         | DGGKNNETFRPGGGDMR  |      | [Hex]5[HexNAc]5[Fuc]1     |

| Env Domain | Charge State | Experimental Mass | Theoretical Mass | Mass Error | Peptide Sequence  | *Mod | Glycan Composition    |
|------------|--------------|-------------------|------------------|------------|-------------------|------|-----------------------|
|            | 1+           | 4083.9895         | 4083.6599        | 81         | DGGKNNTEFRPGGGDMR |      | [Hex]5[HexNAc]6[Fuc]1 |
|            | 1+           | 4286.9059         | 4286.7393        | 39         | DGGKNNTEFRPGGGDMR |      | [Hex]5[HexNAc]7[Fuc]1 |
|            | 1+           | 3287.5950         | 3287.3375        | 78         | DGGKNNTEFRPGGGDMR |      | [Hex]6 [HexNAc]2      |
|            | 1+           | 3636.8081         | 3636.4747        | 92         | DGGKNNTEFRPGGGDMR |      | [Hex]6[HexNAc]3[Fuc]1 |
|            | 1+           | 4043.1326         | 4042.6333        | 124        | DGGKNNTEFRPGGGDMR |      | [Hex]6[HexNAc]5[Fuc]1 |
|            | 1+           | 4245.7936         | 4245.7127        | 19         | DGGKNNTEFRPGGGDMR |      | [Hex]6[HexNAc]6[Fuc]1 |
|            | 1+           | 4449.2774         | 4448.7921        | 109        | DGGKNNTEFRPGGGDMR |      | [Hex]6[HexNAc]7[Fuc]1 |
|            | 1+           | 3449.6587         | 3449.3903        | 78         | DGGKNNTEFRPGGGDMR |      | [Hex]7[HexNAc]2       |
|            | 1+           | 4612.0562         | 4610.8450        | 263        | DGGKNNTEFRPGGGDMR |      | [Hex]7[HexNAc]7[Fuc]1 |
|            | 1+           | 3611.7056         | 3611.4431        | 73         | DGGKNNTEFRPGGGDMR |      | [Hex]8[HexNAc]2       |
|            | 1+           | 3773.7676         | 3773.4959        | 72         | DGGKNNTEFRPGGGDMR |      | [Hex]9[HexNAc]2       |
|            | 1+           | 4545.1953         | 4544.7868        | 90         | DGGKNNTEFRPGGGDMR | mox  | [Hex]9[HexNAc]5[Fuc]1 |
|            | 1+           | 5138.3198         | 5138.0301        | 56         | DGGKNNTEFRPGGGDMR |      | [Hex]9[HexNAc]8[Fuc]1 |
| TM         | 1+           | 2470.3130         | 2470.0502        | 106        | EISNYTDIYR        |      | [Hex]3[HexNAc]3       |
|            | 1+           | 2616.1843         | 2616.1081        | 29         | EISNYTDIYR        |      | [Hex]3[HexNAc]3[Fuc]1 |
|            | 1+           | 2819.2607         | 2819.1874        | 26         | EISNYTDIYR        |      | [Hex]3[HexNAc]4[Fuc]1 |
|            | 1+           | 3022.3398         | 3022.2669        | 24         | EISNYTDIYR        |      | [Hex]3[HexNAc]5[Fuc]1 |
|            | 1+           | 3225.4236         | 3225.3463        | 24         | EISNYTDIYR        |      | [Hex]3[HexNAc]6[Fuc]1 |
|            | 1+           | 3184.4397         | 3184.3196        | 38         | EISNYTDIYR        |      | [Hex]4[HexNAc]5[Fuc]1 |
|            | 1+           | 3387.5632         | 3387.3990        | 48         | EISNYTDIYR        |      | [Hex]4[HexNAc]6[Fuc]1 |
|            | 1+           | 2793.5376         | 2794.1558        | 221        | EISNYTDIYR        |      | [Hex]5 [HexNAc]3      |
|            | 1+           | 2591.1609         | 2591.0764        | 33         | EISNYTDIYR        |      | [Hex]5[HexNAc]2       |
|            | 1+           | 2940.3191         | 2940.2130        | 36         | EISNYTDIYR        |      | [Hex]5[HexNAc]3[Fuc]1 |
|            | 1+           | 3143.3533         | 3143.2931        | 19         | EISNYTDIYR        |      | [Hex]5[HexNAc]4[Fuc]1 |
|            | 1+           | 3346.3785         | 3346.3725        | 2          | EISNYTDIYR        |      | [Hex]5[HexNAc]5[Fuc]1 |
|            | 1+           | 2956.4944         | 2956.2086        | 97         | EISNYTDIYR        |      | [Hex]6[HexNAc]3       |
|            | 1+           | 3508.5603         | 3508.4253        | 38         | EISNYTDIYR        |      | [Hex]6[HexNAc]5[Fuc]1 |
|            | 1+           | 3711.6365         | 3711.5047        | 36         | EISNYTDIYR        |      | [Hex]6[HexNAc]6[Fuc]1 |
|            | 1+           | 3873.9639         | 3873.5574        | 105        | EISNYTDIYR        |      | [Hex]7[HexNAc]6[Fuc]1 |

\*Mod = peptide modification  
for = formylation  
u = carbamylation  
PyroC = Cysteine Deamidation  
PyroQ = Glutamic Acid Deamidation
